1 **Investigating autism associated genes in *C. elegans* reveals candidates with a role in social**  
2 **behaviour**

3 Helena Rawsthorne<sup>1</sup>, Fernando Calahorro<sup>1</sup>, Lindy Holden-Dye<sup>1</sup>, Vincent O' Connor<sup>1</sup>, James  
4 Dillon<sup>1\*</sup>

5 1 School of Biological Sciences, Highfield Campus, University of Southampton, Southampton,  
6 United Kingdom

7 \*Corresponding author: [j.c.dillon@soton.ac.uk](mailto:j.c.dillon@soton.ac.uk)

8

## 9 **Abstract**

10 Autism spectrum disorder (ASD) is a neurodevelopmental disorder characterised by a triad of  
11 behavioural impairments and includes disruption in social behaviour. ASD has a clear genetic  
12 underpinning and hundreds of genes are implicated in its aetiology. However, how single  
13 penetrant genes disrupt activity of neural circuits which lead to affected behaviours is only  
14 beginning to be understood and less is known about how low penetrant genes interact to  
15 disrupt emergent behaviours. Investigations are well served by experimental approaches that  
16 allow tractable investigation of the underpinning genetic basis of circuits that control  
17 behaviours that operate in the biological domains that are neuro-atypical in autism. The  
18 model organism *C. elegans* provides an experimental platform to investigate the effect of  
19 genetic mutations on behavioural outputs including those that impact social biology. Here we  
20 use progeny-derived social cues that modulate *C. elegans* food leaving to assay genetic  
21 determinants of social behaviour. We used the SAFRI Gene database to identify *C. elegans*  
22 orthologues of human ASD associated genes. We identified a number of mutants that  
23 displayed selective deficits in response to progeny. The genetic determinants of this complex  
24 social behaviour highlight the important contribution of synaptopathy and implicates genes  
25 within cell signalling, epigenetics and phospholipid metabolism functional domains. The  
26 approach overlaps with a growing number of studies that investigate potential molecular  
27 determinants of autism in *C. elegans*. However, our use of a complex, sensory integrative,  
28 emergent behaviour provides routes to enrich new or underexplored biology with the  
29 identification of novel candidate genes with a definable role in social behaviour.

## 30 **Introduction**

31 Autism spectrum disorder (ASD) is a pervasive neurodevelopmental behavioural disorder.  
32 ASD is characterised by a triad of behavioural impairments, these being repetitive  
33 behaviours and impairment to verbal and social communication [1]. Neuro-atypical  
34 individuals have been shown to produce altered behavioural outputs in response to a range  
35 of sensory cues [2], including chemosensory cues that drive social behaviours [3].  
36 Impairment within the integration of sensory stimuli is thought to underlie the altered  
37 perception of such cues [4]. This highlights the importance of neural circuits in the  
38 processing of sensory information to coordinate a behavioural output in the social domain  
39 [5].

40 It is well established that there is a strong genetic contribution in autism [6]. The genetic  
41 architecture of ASD is complex with hundreds of genes of varying penetrance implicated in  
42 its aetiology [7]. This is complicated further by the interplay between genetic variants in the  
43 form of rare, highly penetrant, and common low penetrant variants [8, 9]. Common variants  
44 attribute polygenic risk in ASD with mutations to multiple loci having additive effects on a  
45 given phenotype [8]. The burden of common variants in an individual's genetic background  
46 can influence the degree of risk a rare variant can impose [9]. The combinatorial effect of  
47 rare and common variants contributes to the spectrum of phenotypes displayed across  
48 autism cases [10].

49 ASD associated genes span across a range of biological functions, for example synaptic, cell  
50 signalling and epigenetic modification [11]. Evidence suggests that although ASD genes are  
51 functionally diverse they are connected through protein interaction networks [12] and  
52 control processes such as neuronal morphology and synaptic function that modulate the  
53 activity state of neural networks [8, 13, 14]. This means that the consequence of even a

54 single genetic variant can be widespread through inter-connecting gene networks and have  
55 emergent effects on neural circuits [8]. For many ASD associated genes it is still unclear how  
56 they function in neural networks which underpin behavioural phenotypes [15], such as  
57 disrupted social and motor behaviour. However, investigating determinants of defined  
58 neural circuits underpinning autism associated neuro-atypical behaviour is providing  
59 traction for discreet investigation of complex traits. Study of distinct behaviours in mice has  
60 begun to unpick the effect of genetic disruption on molecular circuits and synapse function  
61 [16-18]. Additionally, the impact of genetic variation on a number of synaptic genes has  
62 been extensively studied in various animal models [19-24].

63 Animal models highlight the value of using orthologues to understand the function of ASD  
64 associated genes in behavioural domains associated with autism [25-28]. *C. elegans*  
65 provides a tractable system that allows for the high throughput of genetic determinants to  
66 be investigated in a simple nervous system [29]. Conservation of genes involved in synapse  
67 function and the use of integrative neurons highlights the utility of *C. elegans* neuronal  
68 function and how it co-ordinates complex sensory integrative behaviours that model the  
69 disruptions that are expressed through genetic mutations associated with autism [30, 31].  
70 The genetic homology between the *C. elegans* and mammalian genome [32], and the fact  
71 that mutant strains are widely accessible, means that the *C. elegans* model lends itself to  
72 the systems level analysis of disease associated genes. This has led to a plethora of studies  
73 using single gene analysis to investigate the impact of genetic mutation to ASD associated  
74 gene orthologues on behavioural output [33]. As well as this, *C. elegans* have been utilised  
75 in multiple high-throughput screens which have largely used morphological and locomotory  
76 readouts to screen for behavioural deficit [34-36].

77 Behavioural output in response to integration of sensory cues can be assayed in *C. elegans*  
78 by way of food leaving behaviour. The propensity of a worm to leave a lawn of bacterial  
79 food can be modulated by multiple sensory cues [37]. It has been shown that in the  
80 presence of increasing numbers of progeny, adult worms will leave an otherwise replete  
81 food lawn in a dose-dependent manor. This progeny-dependent food leaving behaviour is  
82 the result of inter-organismal communication and is thought to be underpinned by a novel  
83 social circuit [38]. The utility of this social paradigm to probe autism related dysfunction was  
84 demonstrated by showing that when a penetrant mutation of human neuroligin is  
85 introduced into the worm orthologue, *nlg-1*, it results in disrupted progeny induced food  
86 leaving behaviour [39].

87 We have used this bona fide social paradigm to investigate genetic determinants associated  
88 with human ASD. Investigation of *C. elegans* orthologues in a subset of candidate genes  
89 identified a number that disrupt a social behavioural paradigm in the worm. Furthermore,  
90 we show that whilst a large proportion of mutants displayed behavioural deficit in the social  
91 domain, there was limited disruption to the other phenotypes investigated suggesting a  
92 selective behavioural deficit. Identification of novel candidate genes in this way has also  
93 highlighted key biological functional domains that appear to play an important role in social  
94 behaviour, therefore shedding light on the functional contribution ASD associated genes  
95 may have on the disrupted phenotypes associated with this disorder.

## 96 **Materials and methods**

### 97 **Prioritising ASD associated genes for study in *C. elegans***

98 To identify genes associated with ASD we used SFARI Gene Archive (<http://gene->  
99 [archive.sfari.org/](http://archive.sfari.org/), version 3.0). Within this database the Human Gene Module ([5](https://gene-</a></p></div><div data-bbox=)

100 [archive.sfari.org/database/human-gene/](https://archive.sfari.org/database/human-gene/)) ranks genes from 1-6 based on the evidence  
101 supporting the gene's association with ASD. Genes in category 1-High confidence and  
102 category 2-Strong candidate were selected for analysis due to the fact that data implicating  
103 those genes in ASD reach genome wide significance and there is evidence for the variant  
104 having a functional effect in humans. Orthologous genes in *C. elegans* were identified by  
105 searching the human gene name in WormBase (<https://wormbase.org/>, version WS264) and  
106 using the human gene Ensembl ID in OrthoList (<http://www.greenwalddlab.org/ortholist/>). *C.*  
107 *elegans* strains available for order from the *Caenorhabditis* Genetics Centre (CGC) and/or  
108 the National BioResource Project (NBRP) were prioritised for investigation. Using  
109 information gathered from WormBase, CGC, NBRP and a literature review, mutants were  
110 excluded if they were lethal, sterile or uncoordinated. Thus, we filtered for candidates best  
111 suited to investigation in the food lawn based assay. The prioritised *C. elegans* mutant  
112 strains for study can be found in Table 1. Genes were ascribed to one of five functional  
113 categories: synaptic, neuronal, cell signalling, epigenetic modifiers and phospholipid  
114 metabolism based on their function described by UniProtKB  
115 (<https://www.uniprot.org/uniprot/>). Genes described as having a role in synaptic  
116 transmission, structure, activity or plasticity were categorised as 'synaptic'. Genes with a  
117 role in neuronal excitability or adhesion were categorised as 'neuronal'. Genes described as  
118 having a predominant role in cell signalling pathways were categorised as 'cell signalling'.  
119 Genes with a role in transcriptional regulation or chromatin remodelling were categorised as  
120 'epigenetic modifier'. The gene MBOAT7 is described as functioning in phospholipid  
121 metabolism and so was categorised as 'phospholipid metabolism'.

122 **Table 1: Summary of human genes prioritised for study in *C. elegans* mutant strains**

123

| Human gene      | Gene name                                          | Protein function   | <i>C. elegans</i> orthologue | Allele        | Strain name | Out-crossed | Mutation                                                    | Mutation effect        | Behavioural phenotype                                              | Gene expression                                          |
|-----------------|----------------------------------------------------|--------------------|------------------------------|---------------|-------------|-------------|-------------------------------------------------------------|------------------------|--------------------------------------------------------------------|----------------------------------------------------------|
| <b>Synaptic</b> |                                                    |                    |                              |               |             |             |                                                             |                        |                                                                    |                                                          |
| GRIA1           | Glutamate ionotropic receptor AMPA type subunit 1  | Glutamate receptor | <i>glr-1</i>                 | <i>n2461</i>  | KP4         | 4           | Nonsense mutation in codon 807 [40]                         | LOF [40]               | Defective local search behaviour [41]                              | AVA,AVB, AVD,AVE, PVC,AIB,RMD, RIM,SMD,AVG PVQ,URY [41]  |
|                 |                                                    |                    | <i>glr-2</i>                 | <i>tm669</i>  | FX00669     | 0           | Complex substitution [42]                                   | Unpublished            | Enhanced gustatory plasticity [43]                                 | AVA,AVD,AVE PVC,RMDV, RMDD,AIA, AIB,AVG,RIG, RIA,M1 [44] |
|                 |                                                    |                    | <i>glr-2</i>                 | <i>ok2342</i> | RB1808      | 0           | Deletion [42]                                               | Unpublished            | Unknown                                                            |                                                          |
| GRIN2B          | Glutamate Ionotropic Receptor NMDA Type Subunit 2B | NMDA receptor      | <i>nmr-2</i>                 | <i>ok3324</i> | VC2623      | 1           | Deletion [42]                                               | LOF [34]               | Reduced swimming locomotion [34]                                   | AVA,AVD,AVE, RIM,AVG, PVC [44]                           |
|                 |                                                    |                    | <i>nmr-2</i>                 | <i>tm3785</i> | FX03785     | 0           | Deletion [42]                                               | LOF [45]               | Impaired learning [46]                                             |                                                          |
| NLGN3           | Neuroigin 3                                        | Synaptic adhesion  | <i>nlg-1</i>                 | <i>ok259</i>  | VC228       | 6           | Deletion to half of cholinesterase-like domain and TMD [22] | Null [22]              | Reduced spontaneous reversals [22] Reduced pharyngeal pumping [47] | VA,DA,AIY, URB,URA, PVD,HSN,ADE,URX, AVJ, ALA [22, 47]   |
| NRXN1           | Neurexin 1                                         | Synaptic adhesion  | <i>nrx-1</i>                 | <i>ds1</i>    | SG1         | 3           | Deletion in the long <i>nrx-1</i> isoform [48]              | Unpublished            | Unknown                                                            | Nervous system, GABAergic neurons [49, 50]               |
|                 |                                                    |                    | <i>nrx-1</i>                 | <i>tm1961</i> | FX01961     | 0           | Deletion in the long <i>nrx-1</i> isoform [48]              | Truncated protein [24] | Deficient gentle touch response [24]                               |                                                          |
| PTCHD1          | Patched domain containing 1                        | Synaptic receptor  | <i>ptr-5</i>                 | <i>gk472</i>  | VC1067      | 0           | Deletion [42]                                               | Unpublished            | Unknown                                                            | Unknown                                                  |
| SHANK 2/3       | SH3 and multiple ankyrin repeat domains            | Synaptic scaffold  | <i>shn-1</i>                 | <i>ok1241</i> | RB1196      | 0           | Deletion covering PDZ domain and                            | LOF [51]               | None reported [51]                                                 | Widely expressed [52]                                    |

|                        |                                                |                               |               |               |         |   |                                                                 |                    |                                 |                                                                          |
|------------------------|------------------------------------------------|-------------------------------|---------------|---------------|---------|---|-----------------------------------------------------------------|--------------------|---------------------------------|--------------------------------------------------------------------------|
|                        |                                                |                               |               |               |         |   | proline rich motif [51]                                         |                    |                                 |                                                                          |
|                        |                                                |                               | <i>shn-1</i>  | <i>gk181</i>  | VC376   | 0 | Deletion covering most of ANK repeat and entire PDZ domain [51] | LOF [51]           | Unknown                         |                                                                          |
| SLC6A1                 | Solute carrier family 6 member 1               | GABA transporter              | <i>snf-11</i> | <i>ok156</i>  | RM2710  | 6 | Deletion [53]                                                   | Putative null [53] | None reported [53]              | AVL,RIBR,ALA, RIBL,GLRV, RME,AVF,EF1, EF2,EF3,EF4, Body wall muscle [54] |
|                        |                                                |                               | <i>snf-11</i> | <i>tm625</i>  | FX00625 | 0 | Deletion and insertion [53]                                     | Putative null [53] | Unknown                         |                                                                          |
| SYNGAP1                | Synaptic Ras GTPase activating protein 1       | Ras GTPase activating protein | <i>gap-2</i>  | <i>tm748</i>  | JN147   | 0 | Complex substitution [42]                                       | LOF [55]           | No effect on body bends [55]    | Widely expressed [55]                                                    |
|                        |                                                |                               | <i>gap-2</i>  | <i>ok1001</i> | VC680   | 0 | Complex substitution [42]                                       | Unpublished        | Unknown                         |                                                                          |
| <b>Neuronal</b>        |                                                |                               |               |               |         |   |                                                                 |                    |                                 |                                                                          |
| CACNA1H                | Calcium voltage-gated channel subunit Alpha1 H | Calcium channel               | <i>cca-1</i>  | <i>ad1650</i> | JD21    | 7 | Deletion [56]                                                   | LOF [56]           | Reduced pharyngeal pumping [56] | Pharyngeal muscle, neurons in pharynx and VNC [56]                       |
| CNTN4                  | Contactin 4                                    | Axonal adhesion               | <i>rig-6</i>  | <i>ok1589</i> | VC1125  | 0 | Deletion [57]                                                   | Hypo-morphic [57]  | None reported [57]              | Widely expressed in nervous system [58]                                  |
|                        |                                                |                               | <i>rig-6</i>  | <i>gk376</i>  | VC884   | 0 | Deletion-knocks down expression of isoform a only [57]          | Hypo-morphic [57]  | Unknown                         |                                                                          |
| <b>Cell signalling</b> |                                                |                               |               |               |         |   |                                                                 |                    |                                 |                                                                          |



|                             |                                                               |                      |                 |               |         |   |                                        |                            |                                       |                                                      |
|-----------------------------|---------------------------------------------------------------|----------------------|-----------------|---------------|---------|---|----------------------------------------|----------------------------|---------------------------------------|------------------------------------------------------|
| DYRK1A                      | Dual specificity tyrosine phosphorylation regulated kinase 1A | Protein kinase       | <i>hpk-1</i>    | <i>pk1393</i> | EK273   | 6 | Deletion to most of kinase domain [59] | Null [59]                  | Reduced lifespan [59]                 | Gonad, nervous system – not otherwise specified [59] |
|                             |                                                               |                      | <i>mbk-1</i>    | <i>pk1389</i> | EK228   | 6 | Deletion to most of kinase domain [60] | Putative null [60]         | Reduced lifespan [60]                 | Somatic tissue, not otherwise specified [61]         |
|                             |                                                               |                      | <i>mbk-1</i>    | <i>ok402</i>  | RB677   | 0 | Unknown                                | Unknown                    | Reduced swimming locomotion [34]      |                                                      |
| PTEN                        | Phosphatase and tensin homolog                                | Protein phosphatase  | <i>daf-18</i>   | <i>e1375</i>  | CB1375  | 0 | Insertion [62]                         | Reduction of function [62] | Chemotaxis deficit [63]               | Widely expressed [64]                                |
|                             |                                                               |                      | <i>daf-18</i>   | <i>ok480</i>  | RB712   | 0 | Deletion [65]                          | Putative null [65]         | Abnormal mitotic arrest in dauer [66] |                                                      |
| <b>Epigenetic Modifiers</b> |                                                               |                      |                 |               |         |   |                                        |                            |                                       |                                                      |
| CHD8                        | Chromodomain helicase DNA binding protein 8                   | Transcription factor | <i>chd-7</i>    | <i>gk290</i>  | VC606   | 0 | Deletion [42]                          | Unpublished                | Reduced swimming locomotion [34]      | Unknown                                              |
|                             |                                                               |                      | <i>chd-7</i>    | <i>gk306</i>  | VC676   | 0 | Deletion [42]                          | Unpublished                | Impaired habituation [36]             |                                                      |
| FOXP1                       | Forkhead box P1                                               | Transcription factor | <i>fkh-7</i>    | <i>gk793</i>  | VC1646  | 0 | Deletion [42]                          | Unpublished                | Unknown                               | Widely expressed [67]                                |
| IRF2BPL                     | Interferon regulatory factor 2 binding protein like           | Transcription factor | <i>tag-260</i>  | <i>ok1339</i> | VC812   | 0 | Insertion [42]                         | Putative null [68]         | Unknown                               | Unknown                                              |
| KDM6A                       | Lysine-specific demethylase 6A                                | Histone demethylase  | <i>jmjd-3.1</i> | <i>gk387</i>  | VC912   | 0 | Deletion [42]                          | Unpublished                | Unknown                               | PDA motor neuron and Y cell [69]                     |
|                             |                                                               |                      | <i>jmjd-3.1</i> | <i>gk384</i>  | VC936   | 0 | Insertion [42]                         | Null [70]                  | Unknown                               |                                                      |
| KMT5B                       | Lysine methyltransferase 5B                                   | Transcription factor | <i>set-4</i>    | <i>n4600</i>  | MT14911 | 2 | Deletion [71]                          | LOF [71]                   | Deficient dauer arrest [71]           | Nervous system, not otherwise specified [71]         |

|                                |                                                      |                            |               |               |         |   |               |                    |                             |                               |
|--------------------------------|------------------------------------------------------|----------------------------|---------------|---------------|---------|---|---------------|--------------------|-----------------------------|-------------------------------|
|                                |                                                      |                            | <i>set-4</i>  | <i>ok1481</i> | VC997   | 0 | Deletion [71] | LOF [71]           | Deficient dauer arrest [71] |                               |
| SETD2                          | Histone-lysine N-methyltransferase SETD2             | Transcriptional regulation | <i>met-1</i>  | <i>n4337</i>  | MT16973 | 4 | Deletion [72] | LOF [73]           | Sterility at 25°C [72]      | Broadly expressed [74]        |
|                                |                                                      |                            | <i>met-1</i>  | <i>tm1738</i> | FX01738 | 0 | Deletion [72] | Putative null [72] | Sterility at 25°C [72]      |                               |
| SETD5                          | Histone-lysine N-methyltransferase SETD5             | Transcriptional regulation | <i>set-26</i> | <i>tm3526</i> | FX03526 | 0 | Deletion [42] | Putative null [75] | None reported [75]          | Widely expressed [76]         |
|                                |                                                      |                            | <i>set-24</i> | <i>n4909</i>  | MT16133 | 0 | Unknown [42]  | Unknown            | None reported [77]          | Germline specific [74]        |
|                                |                                                      |                            | <i>set-9</i>  | <i>n4949</i>  | MT16426 | 1 | Deletion [42] | Putative null [75] | None reported [77]          | Germline specific [76]        |
| <b>Phospholipid metabolism</b> |                                                      |                            |               |               |         |   |               |                    |                             |                               |
| MBOAT7                         | Membrane bound O-acyltransferase domain containing 7 | Acetyl transferase         | <i>mboa-7</i> | <i>ok1028</i> | RB1071  | 0 | Deletion [78] | LOF [78]           | Unknown                     | Muscle, vulva, intestine [79] |
|                                |                                                      |                            | <i>mboa-7</i> | <i>gk399</i>  | VC942   | 0 | Deletion [78] | LOF [78]           | Egg laying deficit [79]     |                               |
|                                |                                                      |                            | <i>mboa-7</i> | <i>tm3536</i> | FX03536 | 0 | Deletion [78] | LOF [78]           | Developmental defects [78]  |                               |
|                                |                                                      |                            | <i>mboa-7</i> | <i>tm3645</i> | FX03645 | 0 | Deletion [78] | LOF [78]           | Unknown                     |                               |

124 **Human genes were used to ascribe functional domains. For each human gene the *C. elegans* orthologue used for investigation is listed and the mutant**  
 125 **allele, known phenotypes and expression of the gene indicated. LOF stands for loss of function. AA stands for amino acids. TMD stands for**  
 126 **transmembrane domain. LNS stands for laminin-neurexin-sex hormone-binding globulin. References are indicated.**

## 127 ***C. elegans* culturing and strains used**

128 All *C. elegans* strains were maintained using standard conditions [80]. *C. elegans* were age  
129 synchronised by picking L4 hermaphrodites onto a new plate 18 hours prior to behavioural  
130 assays. Bristol N2 were used as wild-type control. All other strains used can be found in  
131 Table 1. Strains were obtained from either the *Caenorhabditis* Genetics Center or National  
132 BioResource Project.

## 133 **Food leaving Assay**

134 5cm NGM (nematode growth medium) plates were prepared using a standard protocol [80].  
135 50µl of OP50 *E. coli* at OD<sub>600</sub> of 0.8 was gently spotted on the middle of an unseeded plate.  
136 Approximately 18 hours following this, seven L4+1 day old hermaphrodites were picked  
137 onto the centre of the bacterial lawn. Plates were then incubated at 20°C for 24 hours. In all  
138 food leaving assays the number of food leaving events were counted manually during a 30  
139 minute observation period using a binocular dissecting microscope (Nikon SMZ800; X10). A  
140 food leaving event was defined as when the whole of the worm's body came off the  
141 bacterial food lawn, as previously described [39]. Following each food leaving assay the %  
142 proportion of eggs, L1 and L2 progeny on the plate was calculated. For all food leaving  
143 assays N2 and *nlg-1(ok259)* animals were analysed in parallel to other mutant cohorts.  
144 Investigators were blind to the genotypes being observed.

## 145 **Pre-conditioned food leaving assay**

146 NGM plates were prepared and seeded as described above. 18 hours after seeding assay  
147 plates, half were pre-conditioned with progeny using the protocol described previously [38]  
148 and the remaining plates were used as matched unconditioned controls. In the

149 preconditioned plates 10 gravid adults were picked onto the centre of the bacterial lawn  
150 and left to lay 140-200 eggs before being picked off. 18 hours after this, for each mutant  
151 under investigation, seven L4+1 day old hermaphrodites were picked onto the centre of a  
152 naïve bacterial food lawn. This acts as a matched unconditioned control. Another seven  
153 L4+1 day old hermaphrodites were picked onto a pre-conditioned bacterial food lawn in  
154 which 140-200 eggs had developed for 18 hours. The plates were then incubated at 20°C for  
155 2 hours before food leaving events were observed for 30 minutes as described above.

### 156 **Pharyngeal pumping**

157 Following the measurement of food leaving at the 24 hour time point, feeding behaviour  
158 was quantified by counting the pharyngeal pumping of three of the seven worms. The  
159 worms selected for these measurements were on food for the observation period. One  
160 pharyngeal pump was defined as one cycle of contraction-relaxation of the terminal bulb of  
161 the pharyngeal muscle. This behaviour was measured for 1 minute using a binocular  
162 dissecting microscope (Nikon SMZ800; X63) and the pumps per minute for each worm  
163 recorded from a single observation [81].

### 164 **Thrashing**

165 Thrashing analysis was performed on the *C. elegans* mutants that were investigated in the  
166 pre-conditioned food leaving assay. Using a 24 well plate, 6-7 N2 or mutant worms were  
167 picked per well containing 500µl of M9 with 0.1% bovine serum albumin and left for 5-10  
168 minutes before thrashing was observed. For each worm thrashing was counted for 30  
169 seconds. Each thrash was defined as a complete movement through the midpoint of the  
170 worms body and back. For each mutant under investigation N2 control worms were

171 analysed in parallel and at least two separate assays were performed. Investigators were  
172 blind to the genotypes being investigated.

### 173 **Statistical analysis**

174 Statistical analysis was performed using GraphPad Prism 8 software. Data are expressed as  
175 mean or mean  $\pm$ SEM as indicated in the figure legend. Statistical tests and post-hoc analysis  
176 is indicated in the figure legends. Significance level was set to  $P < 0.05$ .

### 177 **Results**

#### 178 **Selection of human ASD associated genes for study using *C. elegans* social behaviour**

179 The genetic architecture of autism is complex with over 1,000 genes currently implicated in  
180 the disorder [11]. Furthermore, the functional contribution that many of these genes make  
181 to the behavioural domains implicated in ASD remains unclear. We have created a pipeline  
182 (Fig 1) to select *C. elegans* orthologues of human ASD associated genes and that can be  
183 investigated in a paradigm of social behaviour in the worm.

184 We used SFARI Gene, a growing database which categorises ASD risk genes based on the  
185 strength of evidence supporting the association. We prioritised 91 genes ranked by SFARI  
186 Gene Archive (accessed October 2018) as category 1-high confidence and category 2-strong  
187 candidate. Of these 91 genes, 84% (76/91) had at least one orthologue in *C. elegans*. A  
188 mutant strain was available for 84% (64/76) of the orthologous genes using the criteria that  
189 the mutant strain was available from the CGC and/or NBRP. Of these, 43 genes had available  
190 mutants that were either lethal, sterile or uncoordinated (Fig 1). We considered that such  
191 phenotypes rendered these mutants unsuitable for investigation in the social behaviour  
192 assay. On this basis we selected 40 *C. elegans* mutants spanning 21 human ASD associated

193 genes for further investigation (Table 1). The human ASD associated genes were each  
194 assigned to a group based upon the functional description of the encoded protein in  
195 UniProtKB database. The functional groupings were: synaptic, neuronal, cell signalling,  
196 epigenetic modifiers and phospholipid metabolism. This led to a distribution of candidates  
197 highlighting 43% as synaptic genes, 33% as epigenetic modifiers, 10% as cell signalling, 9%  
198 neuronal and 5% phospholipid metabolism (Fig 1).

### 199 **Screening mutants using food leaving behaviour identifies ASD associated genetic** 200 **determinants of social behaviour**

201 To investigate food leaving behaviour, mutants were picked onto the centre of a bacterial  
202 lawn and food leaving events were measured after 24 hours. During the 24 hour incubation  
203 period the adult worms lay eggs which hatch into *C. elegans* progeny. It has been previously  
204 shown that progeny-derived social cues mediate a progeny-dependent increase in adult  
205 food leaving behaviour [38]. In accordance with previous findings we observed that N2  
206 worms left the food lawn after 24 hours at a rate of approximately 0.088 leaving  
207 events/worm/minute (Fig 2). We had previously established a blunted food leaving response  
208 for the *nlg-1(ok259)* mutant [39] and this was used as an internal measure in the current  
209 assays (Fig 2).

210 Against this backdrop, N2 and *nlg-1(ok259)* were investigated alongside the selected  
211 mutants we filtered through following initial selection from the SAFRI Gene data base. This  
212 comparison showed that 23 of the 39 *C. elegans* mutants showed a mean food leaving rate  
213 lower than that of *nlg-1(ok259)* suggesting food leaving impairment (Fig 2). Mutants with a  
214 reduced food leaving phenotype were distributed across the five functional categories we

215 defined suggesting genetic disruption within a range of molecular determinants from  
216 distinct biological domains may contribute to the emergence of *C. elegans* social behaviour.  
217 As part of the investigation, where possible, we analysed two or more mutant alleles for a  
218 single gene (Fig 2). For some mutants, for example for *gap-2* and *rig-6* mutants, the two  
219 mutants phenocopied one another and showed a food leaving rate similar to that of N2.  
220 Interestingly, we found two loss-of-function *nmr-2* mutants which also phenocopied one  
221 another but showed significant food leaving impairment (Fig 2). In contrast, there were also  
222 instances where mutant alleles did not phenocopy each other. For example *nrx-1* and *chd-7*  
223 mutants showed one mutant allele with impaired food leaving and one with a behavioural  
224 response to progeny similar to N2 (Fig 2).

225 **Impaired social behaviour of mutants is likely a selective response to progeny derived**  
226 **social cues**

227 Previous work has identified the value of investigating additional behaviours that can be  
228 scored in the observational arena [36]. In this respect the food leaving assay allows for  
229 multi-tracking phenotypic analysis including pharyngeal pumping, development and egg  
230 laying. In the case of pharyngeal pumping and egg laying, this reflects the output of a  
231 defined neuromodulation and the possible consequence progeny exposure might have on  
232 this. In the case of development, this provides insight into whether the mutations perturb  
233 gross development, a useful consideration in a neurodevelopmental disorder.

234 After each food leaving assay we quantified the pharyngeal pump rate of the mutants.  
235 Pharyngeal pumping is modulated via external sensory cues such as food [82]. Therefore we  
236 wanted to test whether another sensory regulated behaviour was affected in these  
237 mutants. 87% of mutants showed no pumping phenotype (Fig 3). In fact the majority of

238 mutants with impaired social behaviour (Fig 2) had a pumping rate similar to N2 (Fig 3). This  
239 shows that most mutants with reduced food leaving behaviour are capable of responding to  
240 food-dependent sensory cues and co-ordinating normal feeding behaviour. In addition, the  
241 *cca-1(ad1650)* mutant which showed the most deficient pumping phenotype (Fig 3) did not  
242 show a food leaving phenotype (Fig 2), further suggesting that deficits in feeding behaviour  
243 are unlikely to explain differences in food leaving behaviour.

244 Next, we measured early development by quantifying the proportion of total progeny that  
245 were eggs, L1 and L2 progeny 24 hours after introducing 7 L4+1. We used % proportion to  
246 normalise for observed variation in the total number of eggs laid. 75% of mutants developed  
247 at a similar rate to N2 showing that there is no gross early developmental delay (Fig 4).

248 Interestingly, whilst early development seems to be largely unaffected we noted a larger  
249 variation in the egg laying of distinct mutants when compared to N2 controls (S1 Fig). The  
250 number of eggs laid by a mutant is an important consideration for this assay because the  
251 density of progeny populating a food lawn is known to influence the food leaving rate of  
252 adult worms [38]. We plotted the relationship between the number of progeny produced by  
253 a mutant and the food leaving behaviour and showed that the two were correlated (Fig 5).

254 Interestingly, this applies to the *nrx-1* and *chd-7* mutants for which the two alleles tested  
255 resulted in distinct social phenotypes (Fig 2). In each case the mutant that showed impaired  
256 social behaviour (Fig 2) also produced fewer progeny (S1 Fig). Producing fewer progeny  
257 means adult worms were exposed to fewer progeny-derived social cues and could explain  
258 the low food leaving rate seen. The correlation between social behaviour and progeny  
259 exposure, and the limited disruption seen to the other phenotypes tested, implies that  
260 progeny-derived social cues selectively effect social behaviour and therefore progeny  
261 exposure is an important consideration in this type of investigation.



## 262 **Exposure to N2 progeny selectively modulates social behaviour in a number of mutants**

263 Those strains which produced few progeny confound the assessment of the reduced food  
264 leaving behaviour as the response is dependent on the density of progeny populating the  
265 food lawn [38]. This was addressed by testing the food leaving behaviour of 30 mutants in  
266 response to an experimentally controlled number of N2 progeny. This used a pre-  
267 conditioning approach in which N2 progeny pre-populate the lawn and precondition them  
268 by mimicking the progeny population that emerge in the first food leaving assay. These  
269 assays allow the acute effect of progeny exposure on food leaving behaviour to be  
270 investigated. This secondary screen focussed on mutants that showed a mean food leaving  
271 rate lower than that of *nlg-1(ok259)* in at least one allele tested (Fig 2). Thus we directly  
272 tested the veracity of mutants that emerge from the first screen and explicitly address the  
273 potential confound of reduced progeny number. For each mutant we performed a paired  
274 experiment in which mutant food leaving was measured on a naïve, unmatched control,  
275 plate containing OP50 and a preconditioned plate that incubated 140-200 eggs for 24 hours  
276 before introducing 7 L4+1 adults. In accordance with previous findings, N2 adults showed  
277 enhanced food leaving in response to progeny and this response was blunted in the *nlg-*  
278 *1(ok259)* adults exposed to pre-loaded N2 progeny (Fig 6).

279 Analysis of mutants in response to pre-loaded N2 progeny revealed a number of mutants  
280 which left infrequently on both naïve and pre-conditioned food lawns, showing little  
281 progeny-enhanced food leaving (Fig 6). We reasoned that the low food leaving rate of these  
282 mutants could be explained by locomotory deficits. To address this we performed a  
283 thrashing assay to assess the innate movement ability of the mutants. Whilst some mutants  
284 showed minor disruption to thrashing behaviour (Fig 7) for most mutants thrashing did not

285 predict food leaving behaviour. For example, *nlg-1(ok259)* and *set-4* mutants showed  
286 deficits in food leaving behaviour (Fig 6) without any impairment to thrashing (Fig 7).  
287 Furthermore, four mutants of the *mboa-7* gene all showed impaired progeny-induced food  
288 leaving behaviour with only one of these mutants having reduced thrashing (Fig 7). This  
289 suggests that food leaving and thrashing behaviours are uncoupled and therefore suggests it  
290 is unlikely that simple motility deficits explain progeny-induced food leaving impairment.  
291 Therefore, deficits in progeny-enhanced food leaving behaviour may be due to an impaired  
292 ability of adult worms to respond to social cues released by progeny in order to modulate  
293 their food leaving behaviour. The social impairment we observed in mutants suggests that a  
294 variety of genes may act as molecular determinants of social behaviour. Interestingly, these  
295 genes were part of synaptic, cell signalling, epigenetic modifier and phospholipid  
296 metabolism categories. This highlights that molecular determinants from these biological  
297 domains may be important for the emergence of social behaviour.

298 The comparison of behaviour on naïve and pre-conditioned lawns also allowed for the  
299 analysis of egg laying behaviour in response to progeny. We quantified the number of eggs  
300 laid by each mutant on naïve and pre-conditioned food lawns after each food leaving assay.  
301 Interestingly, all mutants laid the same number of eggs on naïve and pre-conditioned food  
302 lawns (S2 Fig). This shows that progeny exposure modulates food leaving behaviour and not  
303 egg laying. This therefore suggests that the circuit which integrates progeny cues to sculpt  
304 food leaving motility is independent of egg laying behaviour which is modulated by other  
305 environmental cues.

306 Overall, starting with 91 human ASD associated genes we used criteria based filtering to  
307 define 21 candidate genes for analysis using a *C. elegans* social paradigm. An initial screen of

308 social behaviour in response to progeny produced over 24 hours indicated 23 mutants with  
309 a reduced food leaving phenotype. We then confirmed the veracity of this phenotype using  
310 a progeny pre-conditioned food leaving approach and identified mutants that showed a  
311 socially impaired phenotype. The limited disruption in other phenotypes tested for these  
312 mutants suggests that reduced food leaving is a selective social impairment in response to  
313 progeny-derived social cues. Identification of these mutants highlights genetic determinants  
314 that appear to play a role in social behaviour and also suggests that a number of biological  
315 domains (synaptic, cell signalling, epigenetic modification and phospholipid metabolism) are  
316 important for the coordination of social behaviour.

## 317 **Discussion**

318 ASD is characterised by a triad of behavioural impairments including neuro-atypical  
319 behaviour in the social domain [1]. Individuals with ASD have also been shown to produce  
320 altered behavioural responses to a range of chemosensory cues such as olfactory, tactile  
321 and gustatory cues [5, 83]. Multi-sensory processing deficits identified in ASD highlights the  
322 importance of sensory integration at a circuit level [84] however, it is still unclear how  
323 disruption within neural circuits evoke a modified behavioural output. Recent experiments  
324 have highlighted the value of investigating molecular determinants of ASD in the context of  
325 defined integrative circuits to try and understand more precisely how disruption within  
326 these circuits underpins the phenotypes associated with ASD [16, 17, 36, 47]. Approaches,  
327 such as these, that better resolve the underlying mechanisms should facilitate  
328 pharmacological treatment of ASD and other neuropsychiatric disorders [85].

329 ASD is known to have a complex genetic architecture, with hundreds of genes with varying  
330 penetrance implicated in its aetiology [7]. Although the genetic basis is well documented the

331 functional contribution which many of the genes make to the behavioural domains  
332 associated with ASD is unclear. Animal models have begun to understand genetic  
333 contribution in autism [26]. The analysis of single, high penetrant, variants is becoming  
334 increasingly well refined with the use of animal social behaviours. Use of social behaviours  
335 underpinned by discreet neural circuits has helped establish the role of some ASD  
336 associated genes in the social domain [39, 86]. However, the analysis of common, low  
337 penetrant, variants is more complex. Additive effects from polygenic interaction of multiple  
338 common variants contributes to wide spread disruption at distinct levels of the biological  
339 system which is expressed as an emergent behaviour [8].

340 *C. elegans* have been used in targeted single gene approaches and in screens of ASD  
341 associated genes to provide valuable insight into the role of some genes in sensory  
342 processing, development and learning phenotypes [36, 87]. Recently we have shown the  
343 utility of using a social behavioural paradigm in *C. elegans* to investigate a single ASD  
344 associated gene [39]. This paradigm is based on inter-organismal signalling by use of  
345 chemosensory social cues which results in a progeny-induced food leaving phenotype [38].  
346 In this study we have used this social paradigm in a screen of ASD associated genes and  
347 identified gene candidates with a role in *C. elegans* social behaviour.

348 We created a pipeline to prioritise human genes for investigation using *C. elegans* social  
349 behaviour. From this we identified 21 human genes for investigation using 40 *C. elegans*  
350 mutant orthologues. Similarities between our prioritisation strategy and those used in  
351 previous *C. elegans* studies resulted in the iterative selection of some well-studied ASD  
352 associated genes such as neuroligin and neuroligin [34, 36]. Our study is distinct from others  
353 because we biased our gene filtering approach to select for *C. elegans* mutants that were

354 appropriate for analysis of social behaviour using a pre-conditioned food leaving approach.

355 We were selective in choosing mutants appropriate for our behavioural analysis, for

356 example the exclusion of overt locomotory mutants due to their possible confounding effect

357 on food leaving motility.

358 We used a single point analysis focused on progeny induced food leaving from which we

359 also analysed pharyngeal pumping, early development and egg laying capabilities in

360 response to progeny derived social cues. We identified a number of mutants with an altered

361 behavioural response to progeny populating a food lawn providing evidence that *C. elegans*

362 are capable of modelling disruption to an emergent behaviour in response to mutation to an

363 ASD associated gene. Movement in liquid has been used in other studies to screen ASD

364 associated genes [34]. Our analysis of thrashing in mutants identified that this type of

365 locomotory assay does not accurately predict an impaired food leaving behaviour and does

366 not serve as a surrogate for the more complex integrative progeny-induced social behaviour

367 phenotype. This highlights our behavioural screen as a unique platform which is selectively

368 tuned to identify genetic determinants with a role in social circuits, that when disrupted

369 could appear phenotypically normal in thrashing behaviour.

370 The candidates that we identified as having a role in social behaviour are orthologues of

371 human genes that range in function including synaptic, cell signalling and epigenetic

372 modification. Genes disrupted in each of these domains are known to contribute to ASD [88,

373 89]. Therefore, the genes that emerge from our screen are representative of the main

374 functional domains disrupted in autism. Our screen has therefore produced a diverse list of

375 candidate genes that can be used to interrogate the systems level disruption that evokes

376 modified behavioural output in ASD. Previous work has focused largely on locomotory and

377 morphological readouts of altered behavioural phenotypes [34-36] whereas our approach  
378 facilitates the identification of candidate genes with a role in a more complex, sensory  
379 regulated, emergent behaviour which more closely resembles the social domain disrupted  
380 in autism. Identification of candidates using this approach therefore provides a benchmark  
381 from which the social circuit can be further dissected [90].

382 We identified five synaptic genes, *nlg-1*, *nrx-1*, *shn-1*, *glr-1* and *nmr-2*, with a role in  
383 coordinating progeny-induced social behaviour. In the mammalian nervous system, NLGN,  
384 NRXN and SHANK's interaction at the synapse is well established and dysfunction to all  
385 three genes has been widely implicated in ASD [91]. Synaptic scaffolds including SHANK are  
386 known to interact with receptors such as AMPA and NMDA to help regulate the ion channel  
387 composition at the synapse [92]. This provides evidence that this assay for social interaction  
388 identifies behavioural disruption in orthologues of genes that function together at  
389 mammalian synapses. The role of these mammalian genes in nervous system function  
390 and/or synaptic transmission are functionally conserved in *C. elegans* [40, 49, 51, 93-95].  
391 This means that we can resolve singular determinants with the potential to unpick genes  
392 that encode dysfunctional interactions. This raises the opportunity to model the polygenic  
393 nature of ASD [8, 36, 96-98].

394 Previous scaled use of assays to investigate ASD associated genes in *C. elegans* used  
395 strategies to prioritise genes before behavioural analysis [34-36]. The outcome of these  
396 studies resulted in an incomplete overlap of some genes investigated in our study. We made  
397 a comparison between *C. elegans* mutants that emerged from our study with an impaired  
398 social phenotype to mutants that have emerged from previous studies as having impaired  
399 movement and habituation phenotypes [34, 36]. However, the vast majority of mutants that

400 we identified with behavioural impairment are unique to this study. For example, *shn-*  
401 *1(gk181)* and *set-9(n4949)* show impaired social behaviour in response to progeny, whilst  
402 appearing grossly wild-type for the other phenotypes we tested. In addition these mutants  
403 do not show a behavioural phenotype in movement or habituation behaviour when  
404 investigated in previous studies [34, 36]. This highlights that the emergent behaviour we  
405 have used reveals genes that are missed when they emerge from the bioinformatic pipeline.  
406 This makes the case that applying a lower throughput observer based assay will refine  
407 previous efforts to model the functional impact of genes implicated in ASD.

408 The emergent behaviour that we have used is a complex, sensory integrative behaviour.  
409 Habituation learning is another complex behaviour in *C. elegans* that has been investigated  
410 in a previous screen of ASD associated genes [36]. Therefore, we wanted to identify whether  
411 there was overlap in mutants with behavioural impairment in two distinct complex  
412 behavioural phenotypes. We made a comparison of mutants that we had identified as  
413 having a social impairment to mutants that have been shown to have a habituation  
414 phenotype [36]. We identified four synaptic mutants, *nlg-1(ok259)*, *nrx-1(ds1)*, *glr-1(n2461)*  
415 and *nmr-2(ok3324)*, which have impaired social behaviour and have also been shown to  
416 have a habituation phenotype. This suggests that these genes may have a role in  
417 coordinating more than one complex sensory-regulated behaviour in *C. elegans*. This may  
418 also suggest that a key role of synaptic genes is in coordinating higher behaviours in *C.*  
419 *elegans*. With this in mind it would be interesting to extend the analysis of mutants with  
420 habituation impairment and screen them for social deficits. Our approach lends itself to the  
421 identification of complex behavioural deficits and so would be valuable in this analysis to  
422 further understand if there is an over-representation of synaptic genes in complex sensory  
423 integrative phenotypes.

424 In addition to highlighting the important contribution of synaptic, cell signalling and  
425 epigenetic genes, we identify a gene involved in phospholipid metabolism that appears to  
426 play a role in progeny-induced social behaviour. *mboa-7* is a lysoPI acetyltransferase which  
427 is important in the regulation of phospholipid membranes [99] and cell signalling [78] in *C.*  
428 *elegans*. In mammals, the regulation of membrane composition is important for cellular  
429 processes, signalling and nervous system function [100, 101]. Studies of the MBOAT7  
430 ortholog in mice suggest it may function in brain development [102], however this gene is  
431 comparatively less well studied than other ASD associated genes for its functional  
432 contribution to the disorder. Therefore, the identification of this gene with a role in  
433 progeny-induced social behaviour highlights how this study enriches the understanding of  
434 the molecular determinants of social behaviour from underrepresented genes in autism.

435 In conclusion, investigation of ASD associated orthologues in *C. elegans* identified genes  
436 from a number of candidates implicated in ASD that disrupt social behaviour in the worm.  
437 Identification of these genes highlights how this assay might be used in quantitative  
438 approaches that can probe the single [39] and polygenic nature of ASD and its underpinning  
439 genetic architecture [36]. The robust nature of this assay provokes a better detailing of the  
440 cellular and circuit dependence of this social interaction. Guided by the cellular  
441 determinants of behaviour, investigation can extend to probe the polygenic nature of ASD  
442 and take a similar approach in other psychiatric diseases that have significant consequences  
443 for behavioural traits in the social domain [103, 104].

#### 444 **Acknowledgments**

445 Some strains were provided by the CGC, which is funded by NIH Office of Research  
446 Infrastructure Programs (P40 OD010440). Some strains were provided by the National



447 BioResource Project (NBRP) Japan. This work was funded by the Gerald Kerkut Charitable  
448 Trust.

#### 449 **References**

- 450 1. Faras H, Al Ateeqi N, Tidmarsh L. Autism spectrum disorders. *Ann Saudi Med.*  
451 2010;30(4):295-300. doi: 10.4103/0256-4947.65261. PubMed PMID: WOS:000282624900007.
- 452 2. Balasco L, Provenzano G, Bozzi Y. Sensory Abnormalities in Autism Spectrum Disorders: A  
453 Focus on the Tactile Domain, From Genetic Mouse Models to the Clinic. *Front Psychiatry.*  
454 2020;10:17. doi: 10.3389/fpsyt.2019.01016. PubMed PMID: WOS:000514302500001.
- 455 3. Endevelt-Shapira Y, Perl O, Ravia A, Amir D, Eisen A, Bezalel V, et al. Altered responses to  
456 social chemosignals in autism spectrum disorder. *Nat Neurosci.* 2018;21(1):111-+. doi:  
457 10.1038/s41593-017-0024-x. PubMed PMID: WOS:000423155800019.
- 458 4. Stevenson RA, Siemann JK, Schneider BC, Eberly HE, Woynaroski TG, Camarata SM, et al.  
459 Multisensory Temporal Integration in Autism Spectrum Disorders. *Journal of Neuroscience.*  
460 2014;34(3):691-7. doi: 10.1523/jneurosci.3615-13.2014. PubMed PMID: WOS:000329916600002.
- 461 5. Marco EJ, Hinkley LBN, Hill SS, Nagarajan SS. Sensory processing in autism: a review of  
462 neurophysiologic findings. *Pediatr Res.* 2011;69(5 Pt 2):48R-54R. doi:  
463 10.1203/PDR.0b013e3182130c54. PubMed PMID: 21289533.
- 464 6. Huguet G, Ey E, Bourgeron T. The Genetic Landscapes of Autism Spectrum Disorders. *Annual*  
465 *Review of Genomics and Human Genetics.* 2013;14:191-213. doi: 10.1146/annurev-genom-091212-  
466 153431. PubMed PMID: WOS:000326658500009.
- 467 7. De Rubeis S, Buxbaum JD. Genetics and genomics of autism spectrum disorder: embracing  
468 complexity. *Hum Mol Genet.* 2015;24:R24-R31. doi: 10.1093/hmg/ddv273. PubMed PMID:  
469 WOS:000363021600004.
- 470 8. Iakoucheva LM, Muotri AR, Sebat J. Getting to the Cores of Autism. *Cell.* 2019;178(6):1287-  
471 98. doi: 10.1016/j.cell.2019.07.037. PubMed PMID: WOS:000483983000007.

- 472 9. Bourgeron T. From the genetic architecture to synaptic plasticity in autism spectrum  
473 disorder. *Nat Rev Neurosci*. 2015;16(9):551-63. doi: 10.1038/nrn3992. PubMed PMID:  
474 WOS:000360192100009.
- 475 10. Weiner DJ, Wigdor EM, Ripke S, Walters RK, Kosmicki JA, Grove J, et al. Polygenic  
476 transmission disequilibrium confirms that common and rare variation act additively to create risk for  
477 autism spectrum disorders. *Nature Genet*. 2017;49(7):978-85. Epub 2017/05/15. doi:  
478 10.1038/ng.3863. PubMed PMID: 28504703.
- 479 11. De Rubeis S, He X, Goldberg AP, Poultney CS, Samocha K, Cicek AE, et al. Synaptic,  
480 transcriptional and chromatin genes disrupted in autism. *Nature*. 2014;515(7526):209-U119. doi:  
481 10.1038/nature13772. PubMed PMID: WOS:000344631400038.
- 482 12. Corominas R, Yang XP, Lin GN, Kang SL, Shen Y, Ghamsari L, et al. Protein interaction  
483 network of alternatively spliced isoforms from brain links genetic risk factors for autism. *Nat*  
484 *Commun*. 2014;5:12. doi: 10.1038/ncomms4650. PubMed PMID: WOS:000335221700005.
- 485 13. Krumm N, O'Roak BJ, Shendure J, Eichler EE. A de novo convergence of autism genetics and  
486 molecular neuroscience. *Trends Neurosci*. 2014;37(2):95-105. doi: 10.1016/j.tins.2013.11.005.  
487 PubMed PMID: WOS:000331687300005.
- 488 14. Aguirre-Chen C, Stec N, Ramos OM, Kim N, Kramer M, McCarthy S, et al. A *Caenorhabditis*  
489 *elegans* Model for Integrating the Functions of Neuropsychiatric Risk Genes Identifies Components  
490 Required for Normal Dendritic Morphology. *G3-Genes Genomes Genet*. 2020;10(5):1617-28. doi:  
491 10.1534/g3.119.400925. PubMed PMID: WOS:000532223200017.
- 492 15. Geschwind DH. Genetics of autism spectrum disorders. *Trends Cogn Sci*. 2011;15(9):409-16.  
493 Epub 2011/08/18. doi: 10.1016/j.tics.2011.07.003. PubMed PMID: 21855394.
- 494 16. Kim H, Lim CS, Kaang BK. Neuronal mechanisms and circuits underlying repetitive behaviors  
495 in mouse models of autism spectrum disorder. *Behav Brain Funct*. 2016;12:13. doi: 10.1186/s12993-  
496 016-0087-y. PubMed PMID: WOS:000368476500001.

- 497 17. Golden CEM, Buxbaum JD, Rubeis S. Disrupted circuits in mouse models of autism spectrum  
498 disorder and intellectual disability. *Curr Opin Neurobiol.* 2018;48:106-12. doi:  
499 10.1016/j.conb.2017.11.006. PubMed PMID: WOS:000427101600015.
- 500 18. Lee E, Lee J, Kim E. Excitation/Inhibition Imbalance in Animal Models of Autism Spectrum  
501 Disorders. *Biol Psychiatry.* 2017;81(10):838-47. doi: 10.1016/j.biopsych.2016.05.011. PubMed PMID:  
502 WOS:000400335100005.
- 503 19. Yoo J, Bakes J, Bradley C, Collingridge GL, Kaang BK. Shank mutant mice as an animal model  
504 of autism. *Philos Trans R Soc B-Biol Sci.* 2014;369(1633):13. doi: 10.1098/rstb.2013.0143. PubMed  
505 PMID: WOS:000332463400013.
- 506 20. Verma V, Paul A, Vishwanath AA, Vaidya B, Clement JP. Understanding intellectual disability  
507 and autism spectrum disorders from common mouse models: synapses to behaviour. *Open Biol.*  
508 2019;9(6):30. doi: 10.1098/rsob.180265. PubMed PMID: WOS:000474810600002.
- 509 21. Rabaneda LG, Robles-Lanuza E, Nieto-Gonzalez JL, Scholl FG. Neurexin Dysfunction in Adult  
510 Neurons Results in Autistic-like Behavior in Mice. *Cell Reports.* 2014;8(2):337-45. doi:  
511 10.1016/j.celrep.2014.06.022. PubMed PMID: WOS:000341569800003.
- 512 22. Hunter JW, Mullen GP, McManus JR, Heatherly JM, Duke A, Rand JB. Neuroligin-deficient  
513 mutants of *C. elegans* have sensory processing deficits and are hypersensitive to oxidative stress and  
514 mercury toxicity. *Dis Model Mech.* 2010;3(5-6):366-76. doi: 10.1242/dmm.003442. PubMed PMID:  
515 WOS:000279701700020.
- 516 23. Calahorro F, Ruiz-Rubio M. Functional Phenotypic Rescue of *Caenorhabditis elegans*  
517 Neuroligin-Deficient Mutants by the Human and Rat NLGN1 Genes. *PLoS One.* 2012;7(6):9. doi:  
518 10.1371/journal.pone.0039277. PubMed PMID: WOS:000305583300125.
- 519 24. Calahorro F, Ruiz-Rubio M. Human alpha- and beta-NRXN1 isoforms rescue behavioral  
520 impairments of *Caenorhabditis elegans* neurexin-deficient mutants. *Genes Brain Behav.*  
521 2013;12(4):453-64. doi: 10.1111/gbb.12046. PubMed PMID: WOS:000319834800010.

- 522 25. Schroeder JC, Reim D, Boeckers TM, Schmeisser MJ. Genetic Animal Models for Autism  
523 Spectrum Disorder. In: Wohr M, Krach S, editors. Social Behavior from Rodents to Humans: Neural  
524 Foundations and Clinical Implications. Current Topics in Behavioral Neurosciences. 30. Cham:  
525 Springer International Publishing Ag; 2017. p. 311-24.
- 526 26. Crawley JN. Translational animal models of autism and neurodevelopmental disorders.  
527 Dialogues Clin Neurosci. 2012;14(3):293-305. PubMed PMID: 23226954.
- 528 27. Ueoka I, Pham HTN, Matsumoto K, Yamaguchi M. Autism Spectrum Disorder-Related  
529 Syndromes: Modeling with Drosophila and Rodents. Int J Mol Sci. 2019;20(17):24. doi:  
530 10.3390/ijms20174071. PubMed PMID: WOS:000486888400003.
- 531 28. Tang W, Davidson JD, Zhang G, Conen KE, Fang J, Serluca F, et al. Genetic Control of  
532 Collective Behavior in Zebrafish. iScience. 2020;23(3):100942. Epub 2020/03/18. doi:  
533 10.1016/j.isci.2020.100942. PubMed PMID: 32179471; PubMed Central PMCID: PMC7068127.
- 534 29. Sengupta P, Samuel ADT. Caenorhabditis elegans: a model system for systems neuroscience.  
535 Curr Opin Neurobiol. 2009;19(6):637-43. doi: 10.1016/j.conb.2009.09.009. PubMed PMID:  
536 WOS:000273864300011.
- 537 30. Bargmann CI. Neurobiology of the Caenorhabditis elegans genome. Science.  
538 1998;282(5396):2028-33. doi: 10.1126/science.282.5396.2028. PubMed PMID:  
539 WOS:000077467100037.
- 540 31. Metaxakis A, Petratos D, Tavernarakis N. Multimodal sensory processing in Caenorhabditis  
541 elegans. Open Biol. 2018;8(6):9. doi: 10.1098/rsob.180049. PubMed PMID: WOS:000437009300005.
- 542 32. Lai CH, Chou CY, Chang LY, Liu CS, Lin WC. Identification of novel human genes  
543 evolutionarily conserved in Caenorhabditis elegans by comparative proteomics. Genome Res.  
544 2000;10(5):703-13. doi: 10.1101/gr.10.5.703. PubMed PMID: WOS:000087077100013.
- 545 33. Schmeisser K, Parker JA. Worms on the spectrum - C-elegans models in autism research. Exp  
546 Neurol. 2018;299:199-206. doi: 10.1016/j.expneurol.2017.04.007. PubMed PMID:  
547 WOS:000419261500017.

- 548 34. Schmeisser K, Fardghassemi Y, Parker JA. A rapid chemical-genetic screen utilizing impaired  
549 movement phenotypes in *C.elegans*: Input into genetics of neurodevelopmental disorders. *Exp*  
550 *Neurol.* 2017;293:101-14. doi: 10.1016/j.expneurol.2017.03.022. PubMed PMID:  
551 WOS:000401784300010.
- 552 35. Wong WR, Brugman KI, Maher S, Oh JY, Howe K, Kato M, et al. Autism-associated missense  
553 genetic variants impact locomotion and neurodevelopment in *Caenorhabditis elegans*. *Hum Mol*  
554 *Genet.* 2019;28(13):2271-81. doi: 10.1093/hmg/ddz051. PubMed PMID: WOS:000474259700014.
- 555 36. McDiarmid TA, Belmadani M, Liang J, Meili F, Mathews EA, Mullen GP, et al. Systematic  
556 phenomics analysis of autism-associated genes reveals parallel networks underlying reversible  
557 impairments in habituation. *Proceedings of the National Academy of Sciences.* 2019:201912049. doi:  
558 10.1073/pnas.1912049116.
- 559 37. Shtonda BB, Avery L. Dietary choice behavior in *Caenorhabditis elegans*. *J Exp Biol.*  
560 2006;209(1):89-102. doi: 10.1242/jeb.01955. PubMed PMID: WOS:000235020200018.
- 561 38. Scott E, Hudson A, Feist E, Calahorro F, Dillon J, de Freitas R, et al. An oxytocin-dependent  
562 social interaction between larvae and adult *C. elegans*. *Sci Rep.* 2017;7(1):10122. doi:  
563 10.1038/s41598-017-09350-7.
- 564 39. Rawsthorne H, Calahorro F, Feist E, Holden-Dye L, O'Connor V, Dillon J. Neurotrophin  
565 dependence of social behaviour in *C. elegans* provides a model to investigate an autism associated  
566 gene. *bioRxiv.* 2020:2020.02.03.931592. doi: 10.1101/2020.02.03.931592.
- 567 40. Hart AC, Sims S, Kaplan JM. SYNAPTIC CODE FOR SENSORY MODALITIES REVEALED BY *C-*  
568 *ELEGANS* GLR-1 GLUTAMATE-RECEPTOR. *Nature.* 1995;378(6552):82-5. doi: 10.1038/378082a0.  
569 PubMed PMID: WOS:A1995TC46900055.
- 570 41. Chalasani SH, Chronis N, Tsunozaki M, Gray JM, Ramot D, Goodman MB, et al. Dissecting a  
571 circuit for olfactory behaviour in *Caenorhabditis elegans* *Nature.* 2016;533(7601):130-. doi:  
572 10.1038/nature16515. PubMed PMID: WOS:000375473900053.
- 573 42. <https://wormbase.org>. Wormbase [cited 2020 06.04].

- 574 43. Hukema RK, Rademakers S, Jansen G. Gustatory plasticity in C-elegans involves integration of  
575 negative cues and NaCl taste mediated by serotonin, dopamine, and glutamate. *Learn Mem.*  
576 2008;15(11):829-36. doi: 10.1101/lm.994408. PubMed PMID: WOS:000260602900006.
- 577 44. Brockie PJ, Madsen DM, Zheng Y, Mellem J, Maricq AV. Differential expression of glutamate  
578 receptor subunits in the nervous system of *Caenorhabditis elegans* and their regulation by the  
579 homeodomain protein UNC-42. *Journal of Neuroscience.* 2001;21(5):1510-22. PubMed PMID:  
580 WOS:000167129700013.
- 581 45. Lemieux GA, Cunningham KA, Lin L, Mayer F, Werb Z, Ashrafi K. Kynurenic Acid Is a  
582 Nutritional Cue that Enables Behavioral Plasticity. *Cell.* 2015;160(1-2):119-31. doi:  
583 10.1016/j.cell.2014.12.028. PubMed PMID: WOS:000347923200013.
- 584 46. Vohra M, Lemieux GA, Lin L, Ashrafi K. The beneficial effects of dietary restriction on learning  
585 are distinct from its effects on longevity and mediated by depletion of a neuroinhibitory metabolite.  
586 *PLoS Biol.* 2017;15(8):24. doi: 10.1371/journal.pbio.2002032. PubMed PMID:  
587 WOS:000408756200006.
- 588 47. Calahorra F, Keefe F, Dillon J, Holden-Dye L, O'Connor V. Neuroligin tuning of pharyngeal  
589 pumping reveals extrapharyngeal modulation of feeding in *Caenorhabditis elegans*. *J Exp Biol.*  
590 2019;222(3):11. doi: 10.1242/jeb.189423. PubMed PMID: WOS:000458814600007.
- 591 48. Philbrook A, Ramachandran S, Lambert CM, Oliver D, Florman J, Alkema MJ, et al. Neurexin  
592 directs partner-specific synaptic connectivity in C-elegans. *eLife.* 2018;7:30. doi:  
593 10.7554/eLife.35692. PubMed PMID: WOS:000439542300001.
- 594 49. Maro GS, Gao SB, Olechwier AM, Hung WL, Liu M, Ozkan E, et al. MADD-4/Punctin and  
595 Neurexin Organize C. elegans GABAergic Postsynapses through Neuroligin. *Neuron.*  
596 2015;86(6):1420-32. doi: 10.1016/j.neuron.2015.05.015. PubMed PMID: WOS:000360976300012.
- 597 50. Haklai-Topper L, Soutschek J, Sabanay H, Scheel J, Hobert O, Peles E. The neurexin  
598 superfamily of *Caenorhabditis elegans*. *Gene Expr Patterns.* 2011;11(1-2):144-50. doi:  
599 10.1016/j.gep.2010.10.008. PubMed PMID: WOS:000288351600020.

- 600 51. Oh WC, Song HO, Cho JH, Park BJ. ANK repeat-domain of SHN-1 Is indispensable for in vivo  
601 SHN-1 function in *C. elegans*. *Mol Cells*. 2011;31(1):79-84. doi: 10.1007/s10059-011-0007-9. PubMed  
602 PMID: WOS:000288904200011.
- 603 52. Jee C, Lee J, Lee JI, Lee WH, Park BJ, Yu JR, et al. SHN-1, a Shank homologue in *C. elegans*,  
604 affects defecation rhythm via the inositol-1,4,5-trisphosphate receptor. *FEBS Lett*. 2004;561(1-3):29-  
605 36. doi: 10.1016/s0014-5793(04)00107-3. PubMed PMID: WOS:000220244100005.
- 606 53. Mullen GP, Mathews EA, Saxena P, Fields SD, McManus JR, Moulder G, et al. The  
607 *Caenorhabditis elegans* *snf-11* gene encodes a sodium-dependent GABA transporter required for  
608 clearance of synaptic GABA. *Mol Biol Cell*. 2006;17(7):3021-30. doi: 10.1091/mbc.E06-02-0155.  
609 PubMed PMID: WOS:000238721000015.
- 610 54. Gendrel M, Atlas EG, Hobert O. A cellular and regulatory map of the GABAergic nervous  
611 system of *C. elegans*. *eLife*. 2016;5:38. doi: 10.7554/elife.17686. PubMed PMID:  
612 WOS:000386451900001.
- 613 55. Gyurko MD, Csermely P, Soti C, Stetak A. Distinct roles of the RasGAP family proteins in *C.*  
614 *elegans* associative learning and memory. *Sci Rep*. 2015;5:10. doi: 10.1038/srep15084. PubMed  
615 PMID: WOS:000362814100001.
- 616 56. Steger KA, Shtonda BB, Thacker C, Snutch TP, Avery L. The *C. elegans* T-type calcium channel  
617 CCA-1 boosts neuromuscular transmission. *J Exp Biol*. 2005;208(11):2191-203. doi:  
618 10.1242/jeb.01616. PubMed PMID: WOS:000230016700027.
- 619 57. Katidou M, Tavernarakis N, Karagogeos D. The contactin RIG-6 mediates neuronal and non-  
620 neuronal cell migration in *Caenorhabditis elegans*. *Dev Biol*. 2013;373(1):184-95. doi:  
621 10.1016/j.ydbio.2012.10.027. PubMed PMID: WOS:000312283200017.
- 622 58. Schwarz V, Pan J, Voltmer-Irsch S, Hutter H. IgCAMs redundantly control axon navigation in  
623 *Caenorhabditis elegans*. *Neural Dev*. 2009;4:15. doi: 10.1186/1749-8104-4-13. PubMed PMID:  
624 WOS:000266324400001.

- 625 59. Das R, Melo JA, Thondamal M, Morton EA, Cornwell AB, Crick B, et al. The homeodomain-  
626 interacting protein kinase HPK-1 preserves protein homeostasis and longevity through master  
627 regulatory control of the HSF-1 chaperone network and TORC1restricted autophagy in  
628 *Caenorhabditis elegans*. *PLoS Genet*. 2017;13(10):46. doi: 10.1371/journal.pgen.1007038. PubMed  
629 PMID: WOS:000414161300013.
- 630 60. Mack HID, Zhang PC, Fonslow BR, Yates JR. The protein kinase MBK-1 contributes to lifespan  
631 extension in *daf-2* mutant and germline-deficient *Caenorhabditis elegans*. *Aging-US*. 2017;9(5):1414-  
632 32. doi: 10.18632/aging.101244. PubMed PMID: WOS:000404467700009.
- 633 61. Raich WB, Moorman C, Lacefield CO, Lehrer J, Bartsch D, Plasterk RHA, et al.  
634 Characterization of *Caenorhabditis elegans* homologs of the Down syndrome candidate gene  
635 *DYRK1A*. *Genetics*. 2003;163(2):571-80. PubMed PMID: WOS:000181417200012.
- 636 62. Ogg S, Ruvkun G. The *C-elegans* PTEN homolog, DAF-18, acts in the insulin receptor-like  
637 metabolic signaling pathway. *Mol Cell*. 1998;2(6):887-93. doi: 10.1016/s1097-2765(00)80303-2.  
638 PubMed PMID: WOS:000077856600018.
- 639 63. Adachi T, Kunitomo H, Tomioka M, Ohno H, Okochi Y, Mori I, et al. Reversal of Salt  
640 Preference Is Directed by the Insulin/PI3K and G(q)/PKC Signaling in *Caenorhabditis elegans*.  
641 *Genetics*. 2010;186(4):1309-U383. doi: 10.1534/genetics.110.119768. PubMed PMID:  
642 WOS:000285297000019.
- 643 64. Masse I, Molin L, Billaud M, Solari F. Lifespan and dauer regulation by tissue-specific  
644 activities of *Caenorhabditis elegans* DAF-18. *Dev Biol*. 2005;286(1):91-101. doi:  
645 10.1016/j.ydbio.2005.07.010. PubMed PMID: WOS:000232575800007.
- 646 65. Brisbin S, Liu J, Boudreau J, Peng J, Evangelista M, Chin-Sang I. A Role for *C. elegans* Eph RTK  
647 Signaling in PTEN Regulation. *Dev Cell*. 2009;17(4):459-69. doi: 10.1016/j.devcel.2009.08.009.  
648 PubMed PMID: WOS:000271181400006.



- 649 66. Fukuyama M, Rougvie AE, Rothman JH. C-elegans DAF-18/PTEN mediates nutrient-  
650 dependent arrest of cell cycle and growth in the germline. *Curr Biol*. 2006;16(8):773-9. doi:  
651 10.1016/j.cub.2006.02.073. PubMed PMID: WOS:000237047600023.
- 652 67. Feng HY, Craig HL, Hope IA. Expression Pattern Analysis of Regulatory Transcription Factors  
653 in *Caenorhabditis elegans*. In: Deplancke B, Gheldof N, editors. *Gene Regulatory Networks: Methods*  
654 *and Protocols. Methods in Molecular Biology*. 786. Totowa: Humana Press Inc; 2012. p. 21-50.
- 655 68. De Arras L, Seng A, Lackford B, Keikhaee MR, Bowerman B, Freedman JH, et al. An  
656 Evolutionarily Conserved Innate Immunity Protein Interaction Network. *J Biol Chem*.  
657 2013;288(3):1967-78. doi: 10.1074/jbc.M112.407205. PubMed PMID: WOS:000313751400049.
- 658 69. Zuryn S, Ahier A, Portoso M, White ER, Morin MC, Margueron R, et al. Sequential histone-  
659 modifying activities determine the robustness of transdifferentiation. *Science*. 2014;345(6198):826-  
660 9. doi: 10.1126/science.1255885. PubMed PMID: WOS:000340593100048.
- 661 70. Labbadia J, Morimoto RI. Repression of the Heat Shock Response Is a Programmed Event at  
662 the Onset of Reproduction. *Mol Cell*. 2015;59(4):639-50. doi: 10.1016/j.molcel.2015.06.027. PubMed  
663 PMID: WOS:000362457900014.
- 664 71. Delaney CE, Chen AT, Graniel JV, Dumas KJ, Hu PJ. A histone H4 lysine 20 methyltransferase  
665 couples environmental cues to sensory neuron control of developmental plasticity. *Development*.  
666 2017;144(7):1273-82. doi: 10.1242/dev.145722. PubMed PMID: WOS:000397631800014.
- 667 72. Kreher J, Takasaki T, Cockrum C, Sidoli S, Garcia BA, Jensen ON, et al. Distinct Roles of Two  
668 Histone Methyltransferases in Transmitting H3K36me3-Based Epigenetic Memory Across  
669 Generations in *Caenorhabditis elegans*. *Genetics*. 2018;210(3):969-82. doi:  
670 10.1534/genetics.118.301353. PubMed PMID: WOS:000449400500017.
- 671 73. Pu MT, Ni ZY, Wang MH, Wang XJ, Wood JG, Helfand SL, et al. Trimethylation of Lys36 on H3  
672 restricts gene expression change during aging and impacts life span. *Genes Dev*. 2015;29(7):718-31.  
673 doi: 10.1101/gad.254144.114. PubMed PMID: WOS:000352161600005.

- 674 74. Engert CG, Droste R, van Oudenaarden A, Horvitz HR. A *C. elegans* protein with a PRDM9-like  
675 SET domain localizes to chromatin-associated foci and promotes spermatocyte gene expression,  
676 sperm production and fertility. *PLoS Genet.* 2018;14(4):24. doi: 10.1371/journal.pgen.1007295.  
677 PubMed PMID: WOS:000431115700015.
- 678 75. Greer EL, Beese-Sims SE, Brookes E, Spadafora R, Zhu Y, Rothbart SB, et al. A Histone  
679 Methylation Network Regulates Transgenerational Epigenetic Memory in *C-elegans*. *Cell Reports.*  
680 2014;7(1):113-26. doi: 10.1016/j.celrep.2014.02.044. PubMed PMID: WOS:000334298200014.
- 681 76. Wang WK, Chaturbedi A, Wang MH, An S, Velayudhan SS, Lee SS. SET-9 and SET-26 are  
682 H3K4me3 readers and play critical roles in germline development and longevity. *eLife.* 2018;7:33.  
683 doi: 10.7554/eLife.34970. PubMed PMID: WOS:000435708500001.
- 684 77. Andersen EC, Horvitz HR. Two *C-elegans* histone methyltransferases repress *lin-3* EGF  
685 transcription to inhibit vulval development. *Development.* 2007;134(16):2991-9. doi:  
686 10.1242/dev.009373. PubMed PMID: WOS:000248385000011.
- 687 78. Lee HC, Kubo T, Kono N, Kage-Nakadai E, Gengyo-Ando K, Mitani S, et al. Depletion of *mboa-*  
688 *7*, an enzyme that incorporates polyunsaturated fatty acids into phosphatidylinositol (PI), impairs PI  
689 3-phosphate signaling in *Caenorhabditis elegans*. *Genes Cells.* 2012;17(9):748-57. doi:  
690 10.1111/j.1365-2443.2012.01624.x. PubMed PMID: WOS:000307968500002.
- 691 79. Lee HC, Inoue T, Imae R, Kono N, Shirae S, Matsuda S, et al. *Caenorhabditis elegans mboa-7*,  
692 a member of the MBOAT family, is required for selective incorporation of polyunsaturated fatty  
693 acids into phosphatidylinositol. *Mol Biol Cell.* 2008;19(3):1174-84. doi: 10.1091/mbc.E07-09-0893.  
694 PubMed PMID: WOS:000258951400035.
- 695 80. Brenner S. The genetics of *Caenorhabditis elegans*. *Genetics.* 1974;77(1):71-94.
- 696 81. Dallièrè N, Bhatla N, Luedtke Z, Ma DK, Woolman J, Walker RJ, et al. Multiple excitatory and  
697 inhibitory neural signals converge to fine-tune *Caenorhabditis elegans* feeding to food availability.  
698 *FASEB J.* 2016;30(2):836-48. Epub 2015/10/29. doi: 10.1096/fj.15-279257. PubMed PMID: 26514165.

- 699 82. Li ZY, Li YD, Yi YL, Huang WM, Yang S, Niu WP, et al. Dissecting a central flip-flop circuit that  
700 integrates contradictory sensory cues in *C. elegans* feeding regulation. *Nat Commun.* 2012;3:8. doi:  
701 10.1038/ncomms1780. PubMed PMID: WOS:000303455200013.
- 702 83. Bennetto L, Kuschner ES, Hyman SL. Olfaction and taste processing in autism. *Biol Psychiatry.*  
703 2007;62(9):1015-21. Epub 2007/06/18. doi: 10.1016/j.biopsych.2007.04.019. PubMed PMID:  
704 17572391.
- 705 84. Stevenson RA, Siemann JK, Woynaroski TG, Schneider BC, Eberly HE, Camarata SM, et al.  
706 Evidence for diminished multisensory integration in autism spectrum disorders. *Journal of autism*  
707 *and developmental disorders.* 2014;44(12):3161-7. doi: 10.1007/s10803-014-2179-6. PubMed PMID:  
708 25022248.
- 709 85. Sahin M, Sur M. Genes, circuits, and precision therapies for autism and related  
710 neurodevelopmental disorders. *Science (New York, NY).* 2015;350(6263):10.1126/science.aab3897  
711 aab. Epub 2015/10/15. doi: 10.1126/science.aab3897. PubMed PMID: 26472761.
- 712 86. Silverman JL, Yang M, Lord C, Crawley JN. Behavioural phenotyping assays for mouse models  
713 of autism. *Nat Rev Neurosci.* 2010;11(7):490-502. doi: 10.1038/nrn2851. PubMed PMID: 20559336.
- 714 87. Calahorro F, Alejandre E, Ruiz-Rubio M. Osmotic avoidance in *Caenorhabditis elegans*:  
715 synaptic function of two genes, orthologues of human NRXN1 and NLGN1, as candidates for autism.  
716 *Journal of visualized experiments : JoVE.* 2009;(34). doi: 10.3791/1616. PubMed PMID:  
717 MEDLINE:20010541.
- 718 88. Guang S, Pang N, Deng X, Yang L, He F, Wu L, et al. Synaptopathology Involved in Autism  
719 Spectrum Disorder. *Front Cell Neurosci.* 2018;12:470-. doi: 10.3389/fncel.2018.00470. PubMed  
720 PMID: 30627085.
- 721 89. Rylaarsdam L, Guemez-Gamboa A. Genetic Causes and Modifiers of Autism Spectrum  
722 Disorder. *Front Cell Neurosci.* 2019;13(385). doi: 10.3389/fncel.2019.00385.

- 723 90. Macosko EZ, Pokala N, Feinberg EH, Chalasani SH, Butcher RA, Clardy J, et al. A hub-and-  
724 spoke circuit drives pheromone attraction and social behaviour in C-elegans. *Nature*.  
725 2009;458(7242):1171-U110. doi: 10.1038/nature07886. PubMed PMID: WOS:000265754600048.
- 726 91. Sudhof TC. Neuroligins and neurexins link synaptic function to cognitive disease. *Nature*.  
727 2008;455(7215):903-11. doi: 10.1038/nature07456. PubMed PMID: WOS:000260038300038.
- 728 92. Sheng M, Kim E. The Postsynaptic Organization of Synapses. *Cold Spring Harbor Perspect*  
729 *Biol*. 2011;3(12):20. doi: 10.1101/cshperspect.a005678. PubMed PMID: WOS:000298135700009.
- 730 93. Tong XJ, Lopez-Soto EJ, Li L, Liu HW, Nedelcu D, Lipscombe D, et al. Retrograde Synaptic  
731 Inhibition Is Mediated by alpha-Neurexin Binding to the alpha 2 delta Subunits of N-Type Calcium  
732 Channels. *Neuron*. 2017;95(2):326-+. doi: 10.1016/j.neuron.2017.06.018. PubMed PMID:  
733 WOS:000405857500011.
- 734 94. Maricq AV, Peckol E, Driscoll M, Bargmann CI. Mechanosensory signalling in C. elegans  
735 mediated by the GLR-1 glutamate receptor. *Nature*. 1995;378(6552):78-81. Epub 1995/11/02. doi:  
736 10.1038/378078a0. PubMed PMID: 7477293.
- 737 95. Kano T, Brockie PJ, Sassa T, Fujimoto H, Kawahara Y, Iino Y, et al. Memory in Caenorhabditis  
738 elegans is mediated by NMDA-type ionotropic glutamate receptors. *Curr Biol*. 2008;18(13):1010-5.  
739 Epub 2008/06/26. doi: 10.1016/j.cub.2008.05.051. PubMed PMID: 18583134.
- 740 96. Buddell T, Friedman V, Drozd CJ, Quinn CC. An autism-causing calcium channel variant  
741 functions with selective autophagy to alter axon targeting and behavior. *PLoS Genet*.  
742 2019;15(12):e1008488-e. doi: 10.1371/journal.pgen.1008488. PubMed PMID: 31805042.
- 743 97. Genç Ö, An J-Y, Fetter RD, Kulik Y, Zunino G, Sanders SJ, et al. Homeostatic plasticity fails at  
744 the intersection of autism-gene mutations and a novel class of common genetic modifiers. *eLife*.  
745 2020;9:e55775. doi: 10.7554/eLife.55775.
- 746 98. Sledziowska M, Kalbassi S, Baudouin SJ. Complex Interactions between Genes and Social  
747 Environment Cause Phenotypes Associated with Autism Spectrum Disorders in Mice. *eNeuro*.  
748 2020;7(4):ENEURO.0124-20.2020. doi: 10.1523/ENEURO.0124-20.2020. PubMed PMID: 32669345.

- 749 99. Lee H-C, Inoue T, Imae R, Kono N, Shirae S, Matsuda S, et al. *Caenorhabditis elegans* mboa-7,  
750 a member of the MBOAT family, is required for selective incorporation of polyunsaturated fatty  
751 acids into phosphatidylinositol. *Mol Biol Cell*. 2008;19(3):1174-84. Epub 2007/12/19. doi:  
752 10.1091/mbc.e07-09-0893. PubMed PMID: 18094042.
- 753 100. Volpatti JR, Al-Maawali A, Smith L, Al-Hashim A, Brill JA, Dowling JJ. The expanding spectrum  
754 of neurological disorders of phosphoinositide metabolism. *Dis Model Mech*. 2019;12(8). Epub  
755 2019/08/16. doi: 10.1242/dmm.038174. PubMed PMID: 31413155; PubMed Central PMCID:  
756 PMC6737944.
- 757 101. Raghu P, Joseph A, Krishnan H, Singh P, Saha S. Phosphoinositides: Regulators of Nervous  
758 System Function in Health and Disease. *Front Mol Neurosci*. 2019;12:208-. doi:  
759 10.3389/fnmol.2019.00208. PubMed PMID: 31507376.
- 760 102. Lee H-C, Inoue T, Sasaki J, Kubo T, Matsuda S, Nakasaki Y, et al. LPIAT1 regulates arachidonic  
761 acid content in phosphatidylinositol and is required for cortical lamination in mice. *Mol Biol Cell*.  
762 2012;23(24):4689-700. Epub 2012/10/24. doi: 10.1091/mbc.E12-09-0673. PubMed PMID: 23097495.
- 763 103. St Pourcain B, Robinson EB, Anttila V, Sullivan BB, Maller J, Golding J, et al. ASD and  
764 schizophrenia show distinct developmental profiles in common genetic overlap with population-  
765 based social communication difficulties. *Mol Psychiatr*. 2018;23(2):263-70. Epub 2017/01/03. doi:  
766 10.1038/mp.2016.198. PubMed PMID: 28044064.
- 767 104. Barak B, Feng G. Neurobiology of social behavior abnormalities in autism and Williams  
768 syndrome. *Nat Neurosci*. 2016;19(6):647-55. doi: 10.1038/nn.4276. PubMed PMID: 29323671.

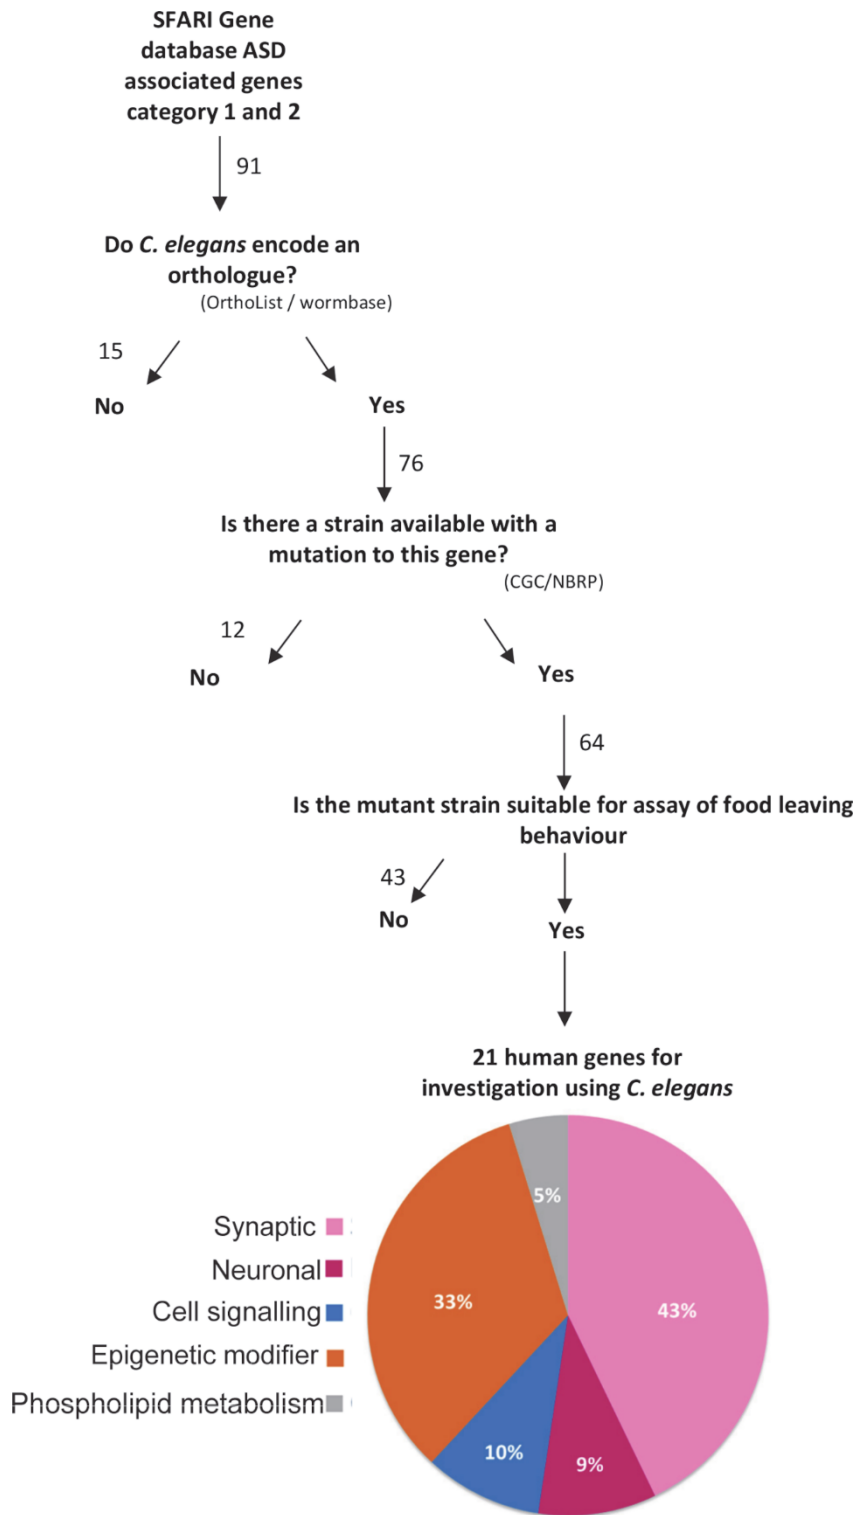

769

770 **Fig 1: Prioritisation and categorization of the *C. elegans* orthologues of prioritised human ASD**

771 **associated genes.** High confidence ASD associated genes in category 1 and 2 in SFARI Gene Archive

772 were input. The pipeline selects human genes which have an orthologue in *C. elegans* which can be

773 studied in an available mutant strain which is neither lethal, sterile or uncoordinated. In brackets are

774 the resources used for analysis. CGC – *Caenorhabditis* Genetics Center. NBRP – National BioResource  
 775 Project. The number of genes analysed using SFARI Gene Archive (<https://gene-archive.sfari.org/>,  
 776 accessed October 2018) are stated. The pie chart indicates the percent of the 21 human genes that  
 777 were placed into five functional groupings.

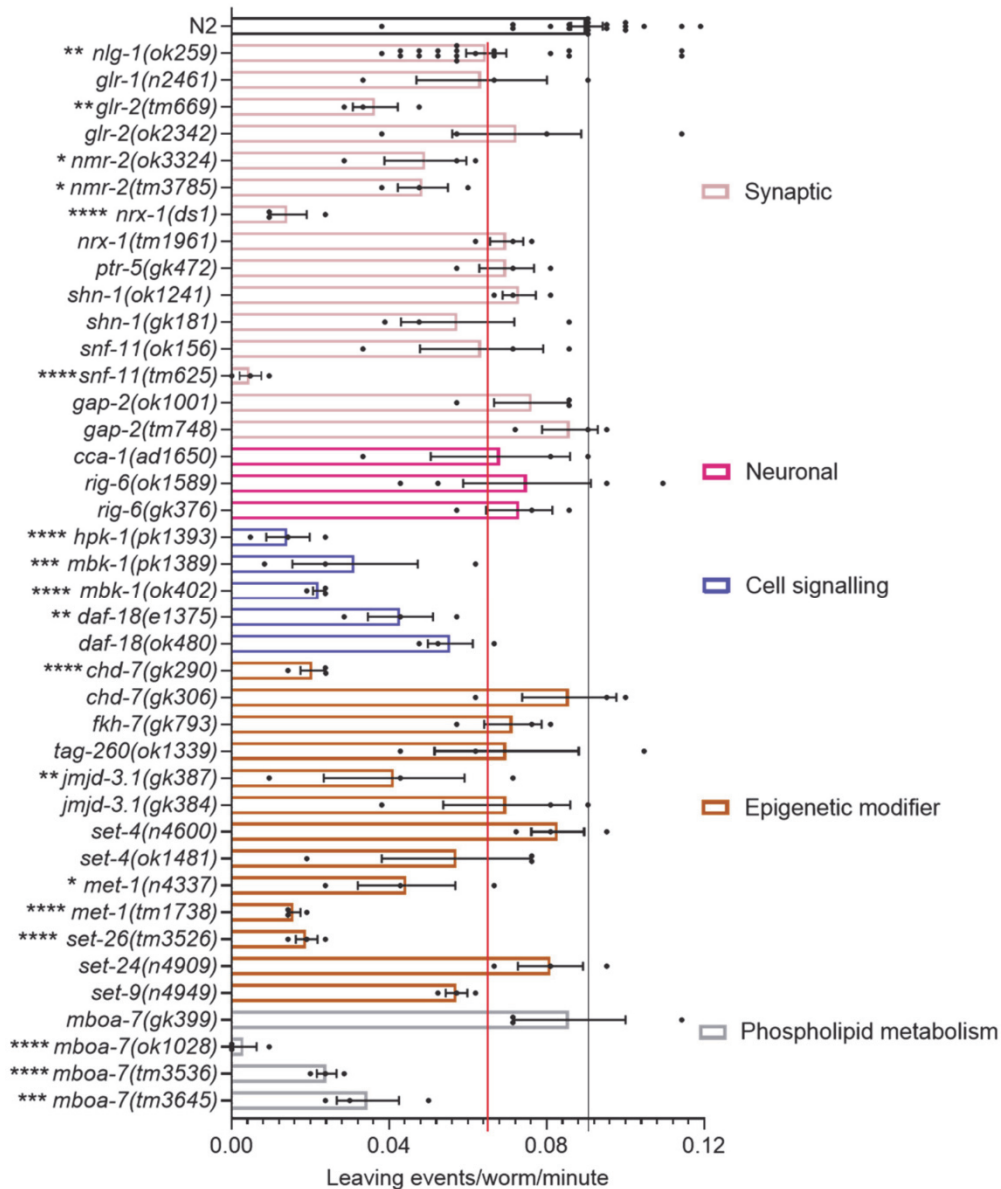

778

779 **Fig 2: Food leaving behaviour of *C. elegans* mutants after 24 hours on food to investigate human**  
 780 **ASD associated genes.** A food leaving assay was performed with N2, *nlg-1(ok259)* and 39 other *C.*  
 781 *elegans* mutants. Genes are categorised and colour coded into different functional domains. The  
 782 black line indicates the number of leaving events/worm/minute for N2 control. The red line indicates

783 the food leaving rate of *nlg-1(ok259)* control. N2 and *nlg-1(ok259)* n=19. All other mutants n=3-4. All  
 784 data shown as mean  $\pm$ SEM. Statistical analysis performed using a one-way ANOVA and Dunnett's  
 785 multiple comparison test; ns,  $p>0.05$ ; \*,  $p<0.05$ ; \*\*,  $p\leq 0.01$ ; \*\*\*,  $p\leq 0.001$ ; \*\*\*\*,  $p\leq 0.0001$ . All  
 786 significance relates to a comparison with N2 control.

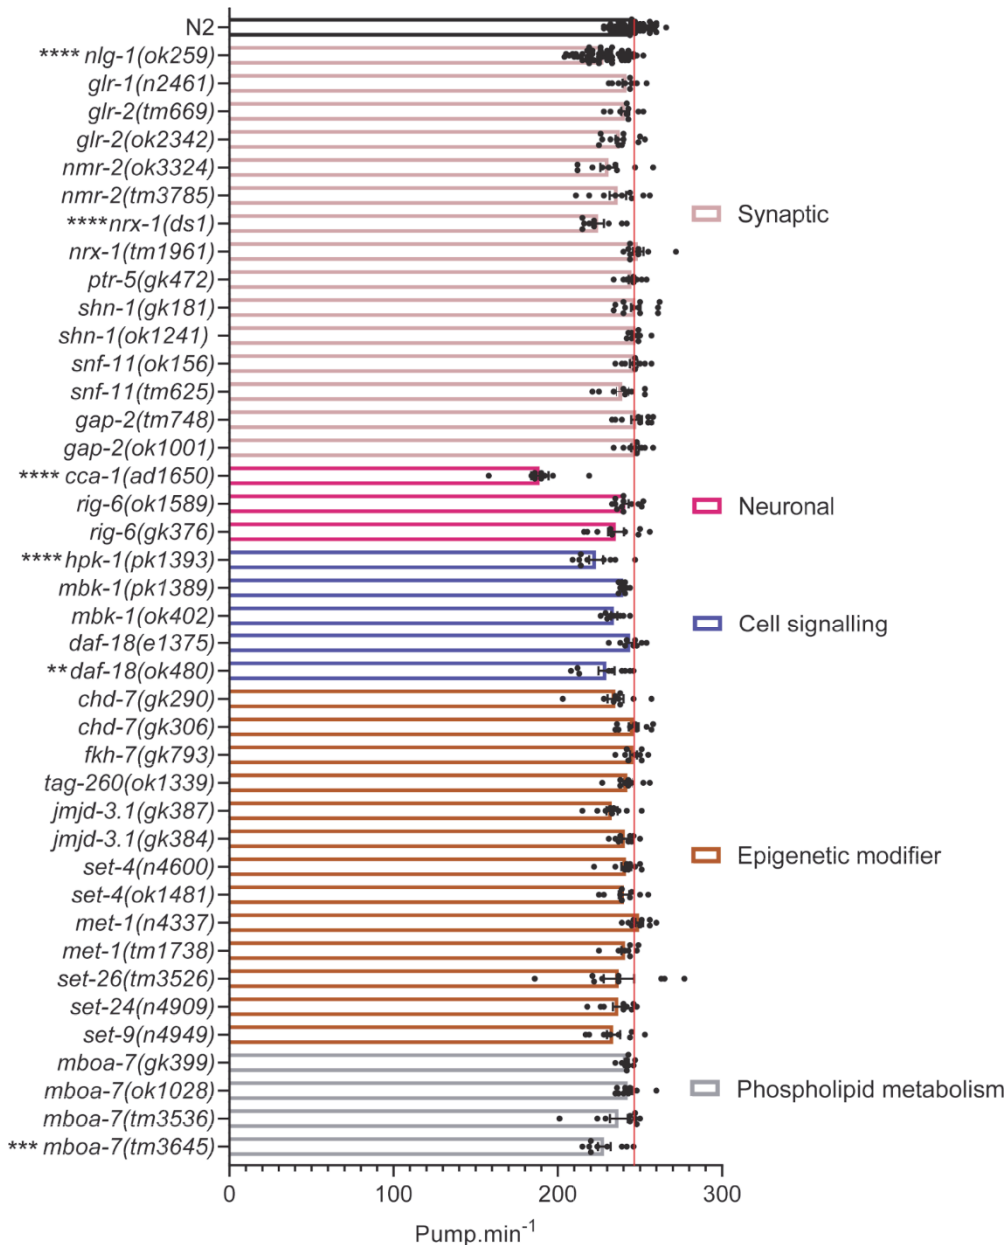

787

788 **Fig 3: Pharyngeal pump rate for *C. elegans* mutants.** After a food leaving assay at 24 hours, three  
 789 worms were chosen at random and their pharyngeal pump rate was counted per minute. N2 and  
 790 *nlg-1(ok259)* n=57. All other mutants n=9-12. The red line indicates pumps per minute for N2  
 791 control. All data shown as mean  $\pm$ SEM. Statistical analysis performed using a one-way ANOVA and



792 Dunnetts's multiple comparison test; ns,  $p > 0.05$ ; \*,  $p < 0.05$ ; \*\*,  $p \leq 0.01$ ; \*\*\*,  $p \leq 0.001$ ; \*\*\*\*,  $p \leq 0.0001$ . All significance relates to a comparison with N2 control.

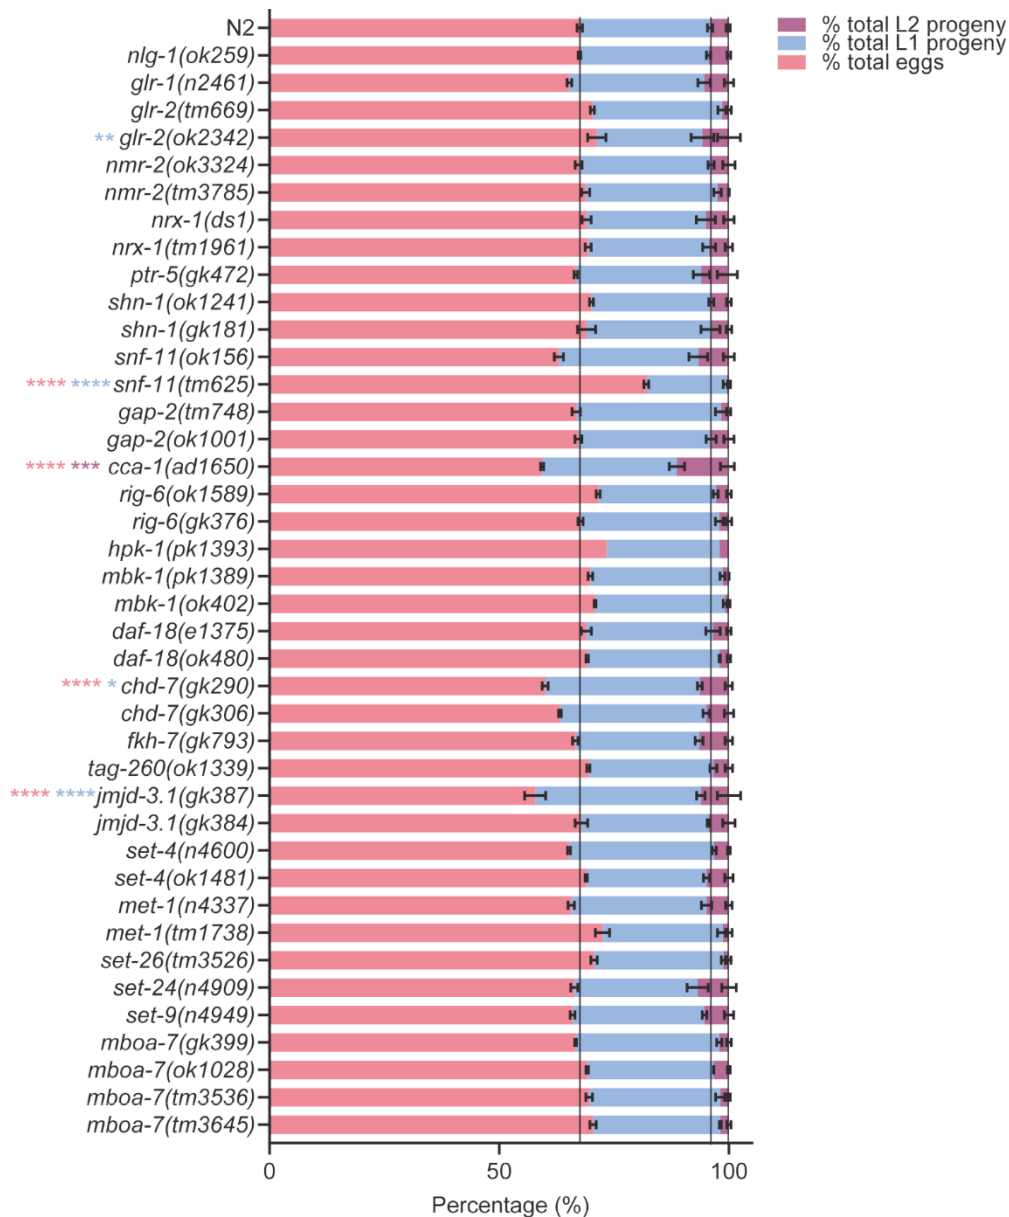

795 **Fig 4: Percent total eggs and progeny produced by *C. elegans* mutants at 24 hours.** After a food  
 796 leaving assay from naïve food lawns occupied by 7 L4+1, the percent total offspring that were eggs,  
 797 L1 and L2 progeny were quantified. N2 and *nlg-1(ok259)* n=19. All other mutants n=3-4. The black  
 798 lines indicate % total eggs, % total L1 progeny and % total L2 progeny for N2 control. Pink asterisks  
 799 indicate statistical difference between mutant and N2 for % total eggs. Blue asterisks indicate  
 800 statistical difference between mutant and N2 for % total L1 progeny. Purple asterisks indicate

801 statistical difference between mutant and N2 for % total L2 progeny. All data shown as mean  $\pm$ SEM.

802 Statistical analysis performed using a two-way ANOVA and Tukey's multiple comparison test; ns,

803  $p > 0.05$ ; \*,  $p < 0.05$ ; \*\*,  $p \leq 0.01$ ; \*\*\*,  $p \leq 0.001$ ; \*\*\*\*,  $p \leq 0.0001$ .

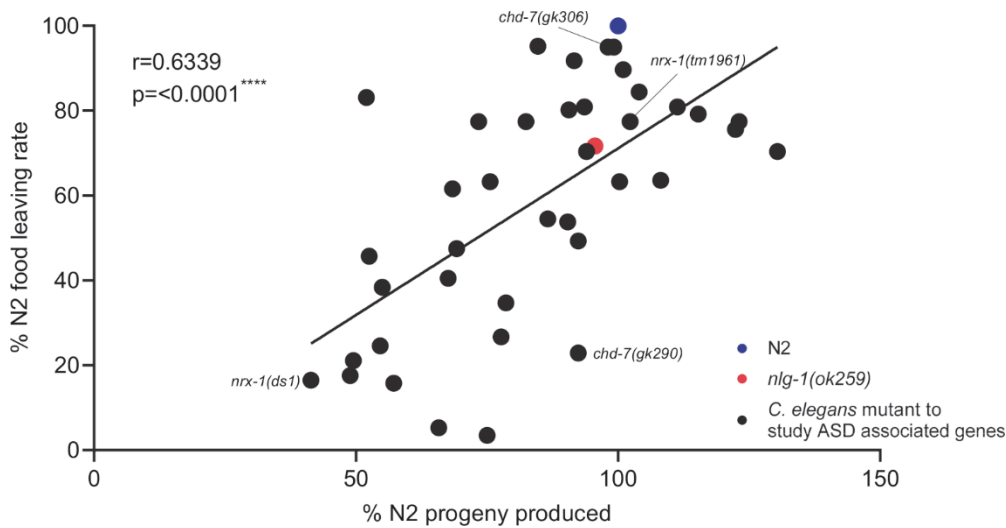

804

805 **Fig 5: Correlation between food leaving behaviour of *C. elegans* mutants and progeny production**

806 **during food leaving assay.** The percent food leaving rate and progeny produced for each *C. elegans*

807 mutant was calculated in comparison to N2. N2 and *nlg-1(ok259)* n=19. All other mutants n=3-4. All

808 data shown as mean. Statistical analysis performed using Pearson correlation coefficient.

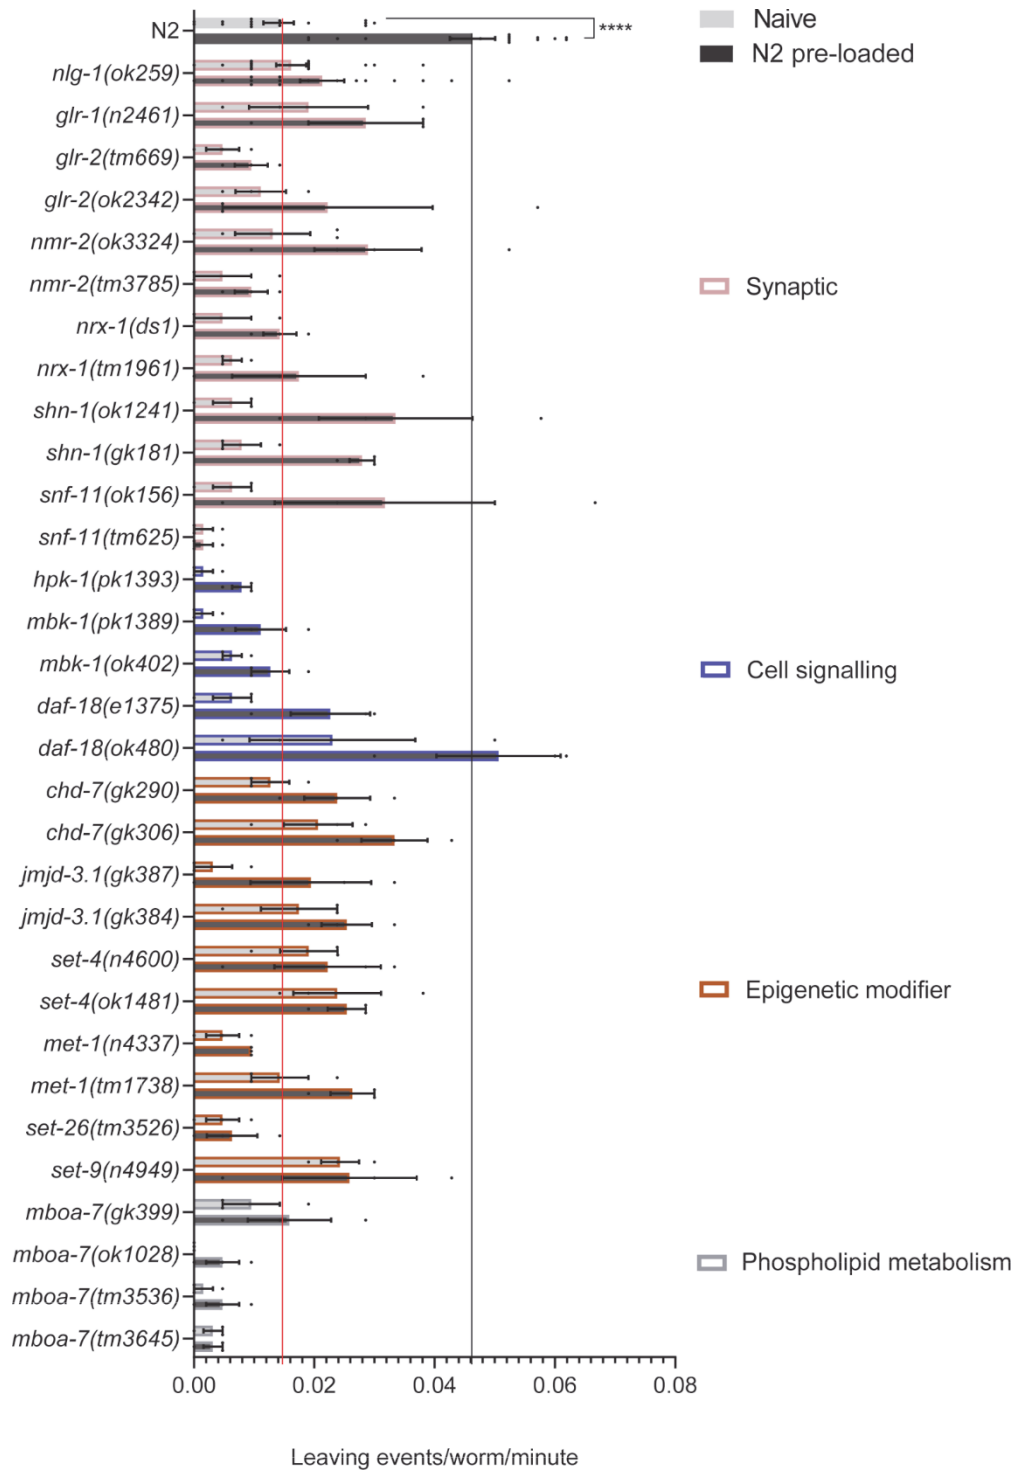

809

Leaving events/worm/minute

810 **Fig 6: Food leaving behaviour of *C. elegans* mutants in the absence of progeny and exposure to N2**

811 **progeny.** A food leaving assay was performed with N2, *nlg-1(ok259)* and 30 other *C. elegans* mutants

812 on naïve and pre-conditioned food lawns. A naïve lawn contains no progeny whereas a pre-

813 conditioned food lawn contains ~150-200 N2 progeny. The red line indicates the food leaving rate of

814 N2 naïve control. The black line indicates the food leaving rate of the N2 pre-loaded control. Data

815 shown as mean  $\pm$ SEM. N2 and *nlg-1(ok259)* n=16. All other mutants n=3-4. Statistical analysis  
 816 performed using a two-way ANOVA and Sidak's multiple comparison test; ns,  $p > 0.05$ ;  $p \leq 0.001$ \*\*\*\*.

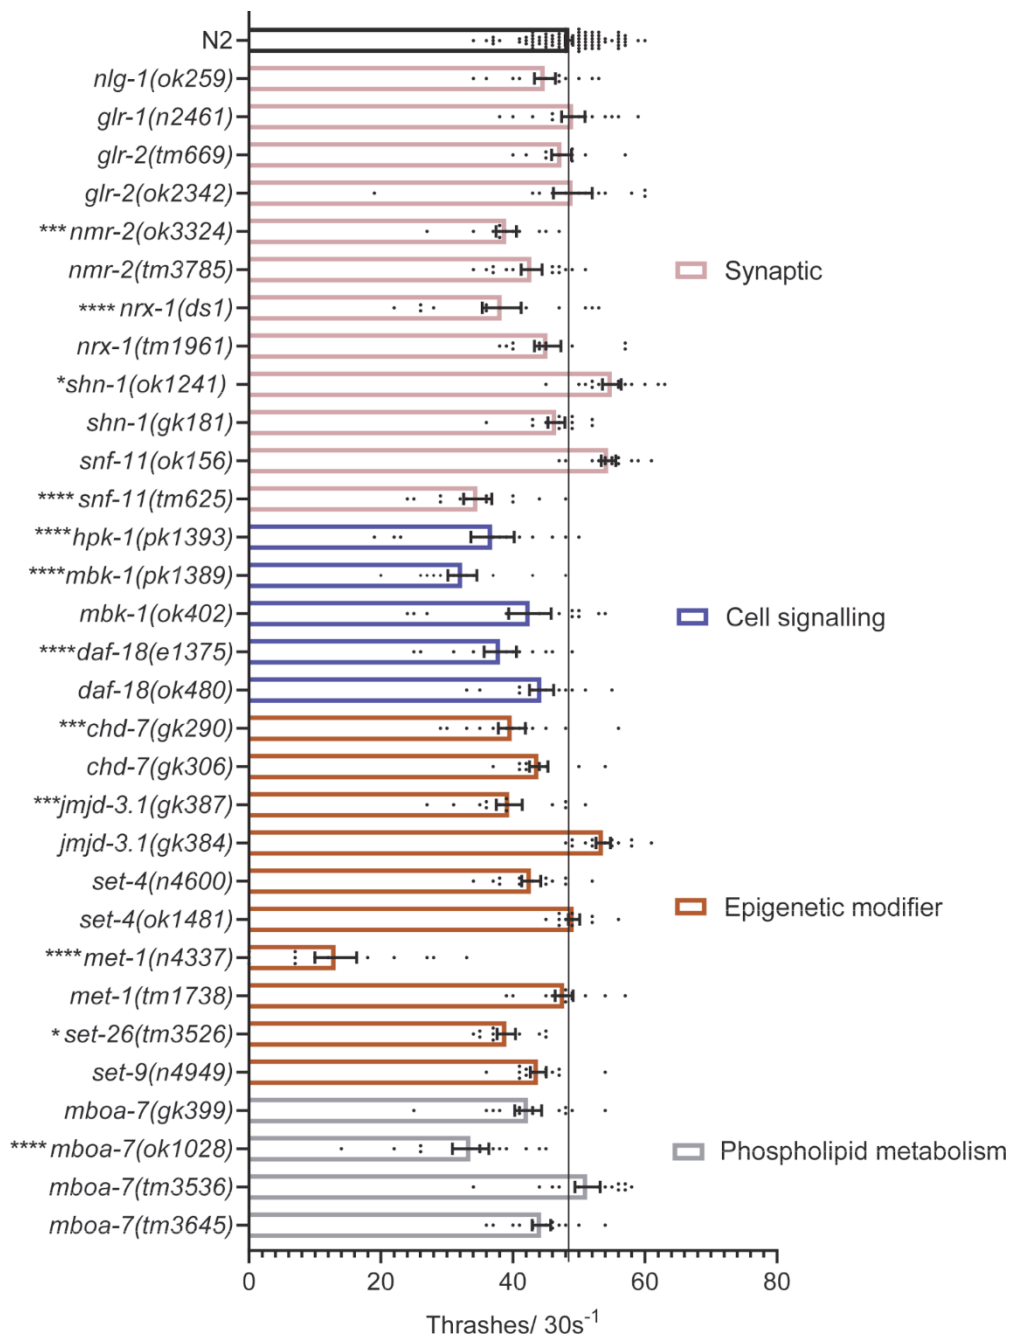

822 comparison test; ns,  $p > 0.05$ ; \*,  $p < 0.05$ ; \*\*\*,  $p \leq 0.001$ ; \*\*\*\*,  $p \leq 0.0001$ . All significance relates to a

823 comparison with N2 control.

824
