# Supplementary material for: Investigating autism associated genes in C. elegans reveals candidates with a role in social behaviour
Source: bioRxiv or medRxiv preprint supplement (doi:10.1101/2020.10.02.311506), 2020-10-02
Supplement: Supplementary file [file media-1.pdf]

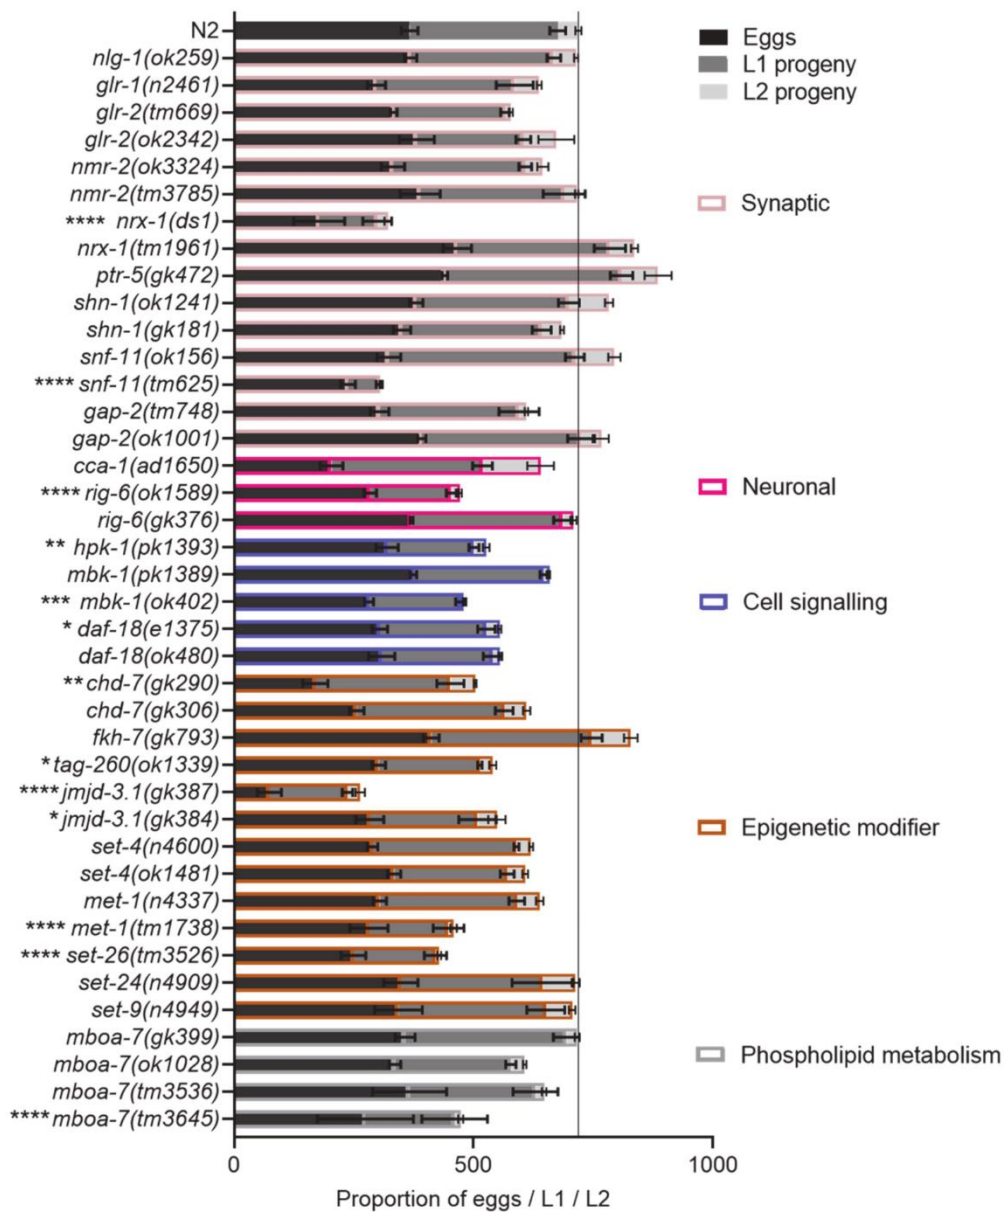

**S1 Fig: Proportion of eggs and progeny produced by *C. elegans* mutants after 24 hours.** After a food leaving assay the number of eggs and progeny produced after 24 hours was counted. N2 and *nlg-1(ok259)* n=19. All other mutants n=3-4. The black line indicates the total number of eggs and progeny produced by N2 control. All data shown as mean  $\pm$ SEM. Statistical analysis performed using a two-way ANOVA and Dunnetts's multiple comparison test; ns,  $p > 0.05$ ; \*,  $p < 0.05$ ; \*\*,  $p \leq 0.01$ ; \*\*\*,  $p \leq 0.001$ ; \*\*\*\*,  $p \leq 0.0001$ . All significance relates to the total number of eggs and progeny produced in comparison with N2 control.

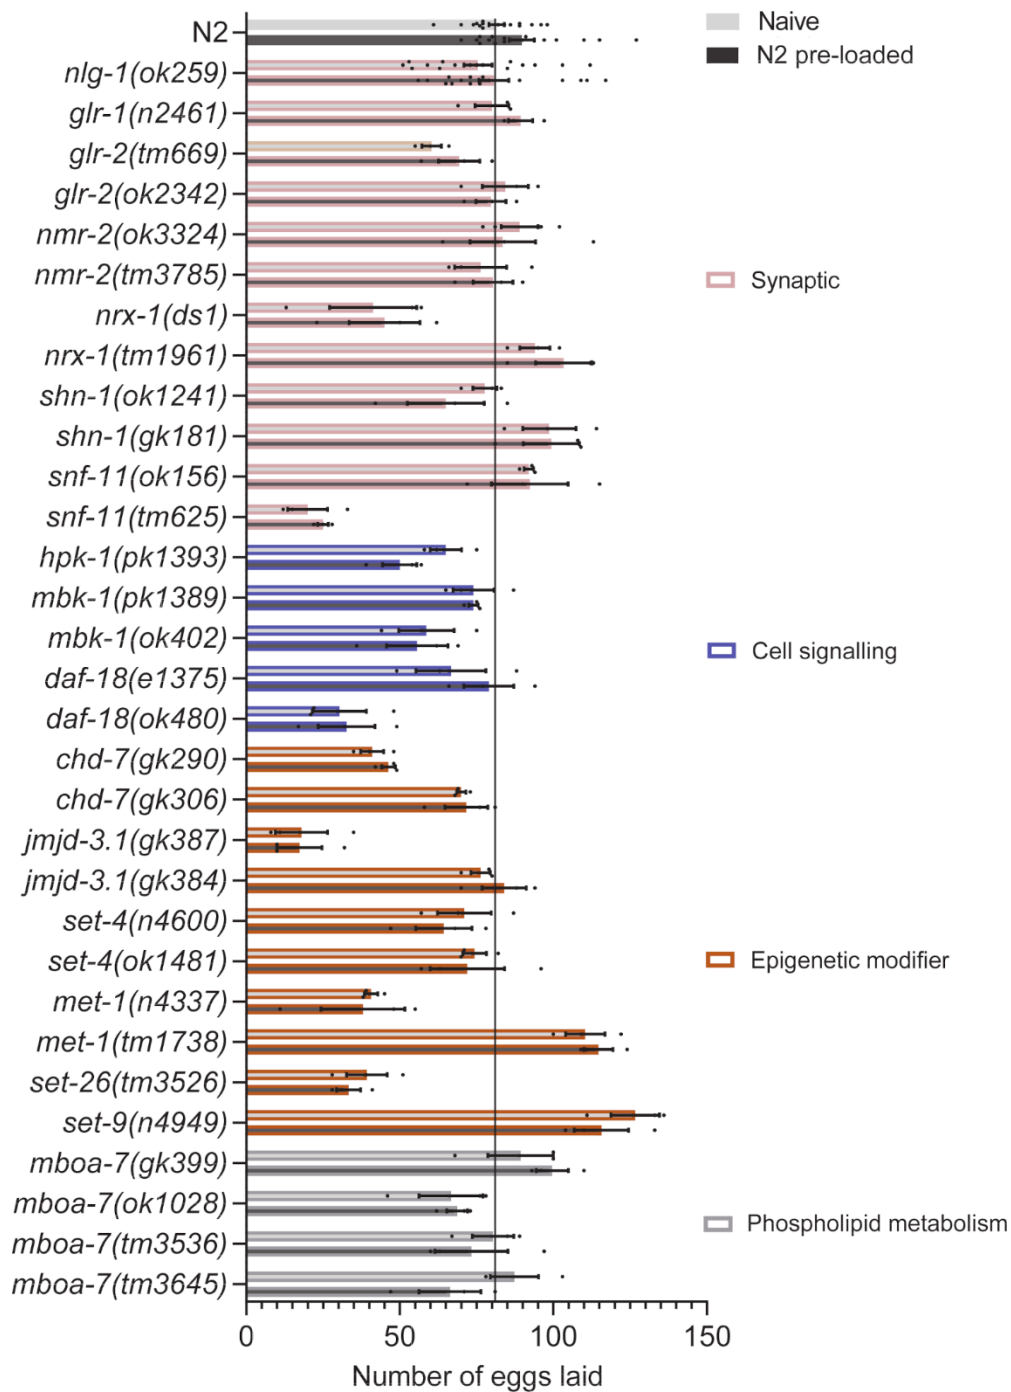

**S2 Fig: The number of eggs laid is unchanged in the presence of progeny.** After a food leaving assay the number of eggs laid was quantified. The black line indicates the number of eggs laid by N2 control. All data shown as mean  $\pm$  SEM. N2 and *nlg-1(ok259)* n=16. All other mutants n=3-4. Statistical analysis performed using a two-way ANOVA and sidak's multiple comparison test. No significance was identified when comparing eggs laid on a naïve and pre-loaded food lawn for each strain.
